# Supplementary material for: The Role of Serotonergic Gene Methylation in Regulating Anxiety-Related Personality Traits in Chimpanzees
Source: Preprints.org preprint supplement (doi:10.20944/preprints202210.0428.v1), 2022-10-27
Supplement: Supplementary file 1 [file supplementary]

**Supplementary information: The role of serotonergic gene  
methylation in regulating anxiety-related personality traits in  
chimpanzees**

Nicky Staes<sup>1,2,3\*</sup>, Elaine E Guevara<sup>1</sup>, William D. Hopkins<sup>4</sup>, Steven J. Schapiro<sup>4</sup>, Marcel  
Eens<sup>2</sup>, Chet C. Sherwood<sup>1</sup>, Brenda J Bradley<sup>1</sup>

<sup>1</sup> Center for the Advanced Study of Human Paleobiology, Department of Anthropology,  
The George Washington University, Washington, DC, 20052, USA

<sup>2</sup> Behavioural Ecology and Ecophysiology Group, Department of Biology, University of  
Antwerp, Wilrijk, 2610, Belgium

<sup>3</sup> Centre for Research and Conservation, Royal Zoological Society of Antwerp, Koningin  
Astridplein 26, 2018, Antwerp, Belgium

<sup>4</sup> Michale E. Keeling Center for Comparative Medicine and Research, The University of  
Texas MD Anderson Cancer Center, Bastrop, TX, 78602, USA

\* The corresponding author

[nicky.staes@uantwerpen.be](mailto:nicky.staes@uantwerpen.be)

**Table S1** : Factor loadings of chimpanzee personality traits on six varimax-rotated factors

| Trait          | Reactivity/<br>Undependabilit<br>y | Dominanc<br>e | Extraversio<br>n | Openness    | Agreeablenes<br>s | Methodical  |
|----------------|------------------------------------|---------------|------------------|-------------|-------------------|-------------|
| Irritable      | <b>0.87</b>                        | -0.09         | -0.05            | -0.09       | -0.13             | 0.15        |
| Temp./moody    | <b>0.85</b>                        | -0.01         | 0.04             | -0.02       | -0.08             | 0.18        |
| Deceptive      | <b>0.79</b>                        | -0.13         | 0.12             | 0.18        | 0.18              | 0.05        |
| Impulsive      | <b>0.77</b>                        | -0.04         | 0.28             | 0.27        | 0.00              | -0.12       |
| Defiant        | <b>0.74</b>                        | -0.06         | 0.31             | 0.22        | -0.03             | -0.10       |
| Mischievous    | <b>0.73</b>                        | 0.07          | 0.41             | 0.33        | -0.01             | -0.13       |
| Jealous        | <b>0.70</b>                        | -0.07         | 0.35             | 0.40        | 0.02              | 0.05        |
| Manipulative   | <b>0.68</b>                        | -0.35         | 0.14             | 0.18        | 0.25              | 0.09        |
| Stingy         | <b>0.68</b>                        | -0.49         | 0.07             | -0.06       | 0.23              | 0.03        |
| Bullying       | <b>0.68</b>                        | -0.56         | 0.25             | -0.07       | 0.06              | 0.03        |
| Aggressive     | <b>0.66</b>                        | -0.42         | 0.41             | -0.12       | -0.06             | 0.14        |
| Eccentric      | <b>0.62</b>                        | 0.13          | -0.22            | 0.36        | -0.04             | -0.14       |
| Socially-inept | <b>0.58</b>                        | 0.36          | 0.02             | 0.07        | -0.37             | -0.06       |
| Calm           | <b>-0.57</b>                       | -0.06         | -0.50            | 0.02        | 0.37              | -0.10       |
| Excitable      | <b>0.56</b>                        | -0.08         | 0.49             | 0.19        | -0.22             | 0.09        |
| Autistic       | <b>0.42</b>                        | 0.36          | -0.22            | 0.05        | -0.03             | -0.28       |
| Fearful        | 0.03                               | <b>-0.88</b>  | -0.11            | 0.05        | -0.12             | -0.01       |
| Timid          | -0.14                              | <b>-0.84</b>  | -0.27            | -0.23       | -0.09             | -0.04       |
| Cautious       | -0.23                              | <b>-0.81</b>  | -0.11            | -0.13       | 0.07              | -0.01       |
| Dominant       | 0.40                               | <b>0.78</b>   | 0.16             | -0.03       | 0.18              | 0.13        |
| Dependent      | -0.02                              | <b>-0.76</b>  | 0.21             | 0.01        | 0.30              | -0.15       |
| Anxious        | 0.32                               | <b>-0.75</b>  | 0.28             | -0.07       | -0.05             | 0.20        |
| Bold           | 0.53                               | <b>0.61</b>   | 0.35             | 0.29        | 0.12              | 0.05        |
| Relaxed        | -0.44                              | <b>0.48</b>   | -0.46            | 0.05        | 0.31              | -0.15       |
| Solitary       | -0.18                              | 0.16          | <b>-0.77</b>     | -0.18       | -0.29             | 0.08        |
| Depressed      | 0.03                               | 0.32          | <b>-0.76</b>     | -0.13       | 0.02              | 0.01        |
| Active         | 0.26                               | 0.09          | <b>0.72</b>      | 0.47        | -0.10             | 0.12        |
| Playful        | 0.20                               | 0.06          | <b>0.67</b>      | 0.58        | -0.06             | -0.09       |
| Sexual         | 0.29                               | -0.07         | <b>0.65</b>      | 0.01        | 0.30              | 0.22        |
| Affiliative    | 0.09                               | 0.09          | <b>0.53</b>      | 0.43        | 0.49              | 0.02        |
| Human oriented | 0.08                               | -0.14         | -0.02            | <b>0.83</b> | 0.01              | 0.05        |
| Inq./Curious   | 0.26                               | -0.01         | 0.30             | <b>0.80</b> | -0.03             | 0.00        |
| Inventive      | 0.28                               | 0.03          | 0.20             | <b>0.76</b> | 0.12              | 0.14        |
| Intelligent    | -0.01                              | -0.19         | 0.09             | <b>0.70</b> | -0.08             | 0.50        |
| Aff./Friendly  | -0.28                              | -0.03         | 0.27             | <b>0.61</b> | 0.41              | -0.11       |
| Persistent     | 0.46                               | -0.34         | 0.10             | <b>0.54</b> | 0.11              | 0.15        |
| Protective     | 0.15                               | -0.20         | 0.06             | -0.08       | <b>0.78</b>       | 0.15        |
| Considerate    | -0.44                              | 0.16          | -0.01            | 0.25        | <b>0.63</b>       | 0.14        |
| Self-caring    | 0.05                               | 0.06          | 0.20             | 0.31        | 0.32              | <b>0.55</b> |
| Methodical     | 0.16                               | -0.44         | -0.26            | 0.30        | 0.33              | <b>0.54</b> |

Boldface indicates the items with loadings  $>|0.40|$  that load onto the factor

## PCA approach

PCAs were done on individual CpG scores per gene, using varimax rotation with Kaiser normalization and the number of dimensions to extract was determined based on parallel analysis (53). Coefficients of correlation for methylation scores  $>|0.5|$  were considered high and therefore salient and kept for further analysis, resulting in two six component models (Table S1 and S2). For both PCAs, inter-variable correlations were sufficiently high (Bartlett's test of sphericity<sub>HTR1A</sub>:  $\chi^2 = 526.29$ ,  $df = 210$ ,  $p < 0.001$ ; Bartlett's test of sphericity<sub>SLC6A4</sub>:  $\chi^2 = 711.69$ ,  $df = 300$ ,  $p < 0.001$ ) and sampling adequacy was high ( $KMO_{HTR1A} = 0.683$ ;  $KMO_{SLC6A4} = 0.686$ ). For *HTR1A*, all CpG sites showed salient loadings on at least one PC and were therefore included in the analysis but for *SLC6A4* two CpGs did not load (cg06961290 and cg20592995) and were therefore dropped from further analysis.

**Table S2:** *HTR1A* CpG factor item loadings on varimax-rotated factors

| CpG ID               | PC1          | PC2          | PC3          | PC4          | PC5          | PC6          | $h^2$ |
|----------------------|--------------|--------------|--------------|--------------|--------------|--------------|-------|
| cg04799838           | <b>0.857</b> | -0.078       | -0.049       | 0.066        | 0.093        | 0.015        | 0.756 |
| cg10588470           | <b>0.751</b> | 0.044        | 0.315        | 0.212        | -0.017       | -0.128       | 0.728 |
| cg23448729           | <b>0.688</b> | 0.399        | 0.329        | 0.189        | 0.104        | -0.054       | 0.790 |
| cg04427003           | <b>0.687</b> | -0.083       | 0.091        | 0.047        | -0.006       | 0.348        | 0.610 |
| cg27615388           | <b>0.677</b> | 0.198        | 0.188        | 0.044        | 0.370        | 0.340        | 0.788 |
| cg04694812           | <b>0.530</b> | 0.010        | -0.053       | -0.434       | 0.399        | 0.098        | 0.641 |
| cg20598238           | -0.128       | <b>0.905</b> | -0.021       | 0.005        | 0.057        | 0.005        | 0.840 |
| cg08764163           | 0.086        | <b>0.722</b> | 0.022        | 0.400        | -0.032       | 0.138        | 0.709 |
| cg11615755           | 0.250        | <b>0.543</b> | 0.236        | 0.152        | -0.067       | 0.207        | 0.483 |
| cg16807523           | 0.111        | <b>0.541</b> | 0.226        | 0.019        | 0.429        | 0.024        | 0.541 |
| cg15092168           | 0.005        | 0.052        | <b>0.835</b> | 0.060        | 0.116        | 0.153        | 0.740 |
| cg08259925           | 0.279        | 0.194        | <b>0.75</b>  | -0.006       | -0.039       | 0.051        | 0.682 |
| cg27420687           | 0.082        | 0.230        | -0.064       | <b>0.836</b> | 0.014        | 0.218        | 0.811 |
| cg13666507           | 0.238        | -0.026       | 0.063        | <b>0.769</b> | -0.139       | -0.179       | 0.704 |
| cg10198270           | -0.003       | 0.278        | 0.234        | <b>0.598</b> | 0.432        | 0.191        | 0.713 |
| cg16280141           | 0.233        | -0.003       | -0.046       | -0.098       | <b>0.738</b> | 0.094        | 0.620 |
| cg17386123           | 0.005        | 0.553        | 0.203        | -0.192       | <b>0.584</b> | 0.014        | 0.725 |
| cg07839533           | 0.132        | -0.137       | 0.515        | 0.188        | <b>0.554</b> | 0.051        | 0.647 |
| cg11432303           | -0.322       | 0.474        | -0.075       | 0.229        | <b>0.53</b>  | 0.303        | 0.759 |
| cg02266732           | 0.093        | 0.112        | 0.127        | 0.112        | 0.168        | <b>0.855</b> | 0.810 |
| cg09698471           | 0.285        | 0.253        | 0.544        | -0.147       | 0.056        | <b>0.609</b> | 0.837 |
| Eigenvalue           | 5.888        | 2.933        | 2.226        | 1.472        | 1.314        | 1.101        |       |
| % variance explained | 28.039       | 13.966       | 10.6         | 7.007        | 6.258        | 5.244        |       |

**Table S3:** *SLC6A4* CpG factor item loadings on varimax-rotated factors

| CpG ID               | PC1           | PC2          | PC3           | PC4          | PC5          | PC6          | $h^2$ |
|----------------------|---------------|--------------|---------------|--------------|--------------|--------------|-------|
| cg10146136           | <b>0.839</b>  | 0.129        | 0.170         | -0.129       | 0.040        | -0.115       | 0.780 |
| cg00386645           | <b>0.766</b>  | 0.117        | 0.121         | 0.073        | -0.156       | 0.164        | 0.671 |
| cg06841846           | <b>-0.666</b> | 0.209        | -0.009        | 0.224        | 0.364        | 0.050        | 0.672 |
| cg10241426           | <b>0.664</b>  | 0.161        | 0.418         | 0.071        | -0.267       | -0.008       | 0.718 |
| cg14312898           | <b>0.585</b>  | 0.533        | 0.138         | 0.054        | 0.007        | 0.092        | 0.657 |
| cg01991100           | <b>0.577</b>  | 0.460        | 0.459         | 0.195        | -0.005       | 0.033        | 0.795 |
| cg16647683           | <b>0.472</b>  | 0.269        | 0.407         | 0.042        | -0.358       | -0.113       | 0.603 |
| cg06373684           | 0.001         | <b>0.854</b> | -0.095        | 0.178        | 0.029        | -0.149       | 0.793 |
| cg08743901           | 0.098         | <b>0.772</b> | 0.066         | -0.240       | 0.017        | -0.103       | 0.679 |
| cg26438554           | 0.168         | <b>0.733</b> | -0.154        | 0.369        | 0.036        | 0.014        | 0.726 |
| cg03829016           | 0.013         | <b>0.728</b> | -0.118        | 0.089        | 0.005        | 0.438        | 0.743 |
| cg05016953           | -0.157        | -0.071       | <b>-0.817</b> | 0.170        | -0.124       | 0.205        | 0.783 |
| cg14692377           | 0.049         | 0.233        | <b>-0.788</b> | 0.235        | 0.188        | -0.024       | 0.769 |
| cg25725890           | -0.223        | 0.019        | <b>-0.666</b> | -0.254       | 0.172        | 0.118        | 0.601 |
| cg01330016           | 0.335         | -0.122       | <b>0.601</b>  | -0.080       | -0.145       | 0.159        | 0.541 |
| cg20209182           | 0.331         | 0.526        | <b>0.534</b>  | 0.188        | -0.129       | 0.129        | 0.741 |
| cg05951817           | -0.019        | 0.157        | 0.016         | <b>0.910</b> | -0.122       | -0.020       | 0.869 |
| cg03363743           | -0.121        | 0.043        | -0.169        | <b>0.869</b> | 0.069        | -0.219       | 0.853 |
| cg22584138           | -0.011        | 0.036        | -0.015        | <b>0.857</b> | 0.047        | 0.073        | 0.743 |
| cg27427014           | 0.405         | 0.198        | 0.188         | <b>0.410</b> | 0.285        | -0.039       | 0.489 |
| cg10901968           | -0.019        | 0.014        | -0.207        | 0.031        | <b>0.860</b> | 0.066        | 0.788 |
| cg26741280           | -0.233        | 0.005        | -0.075        | -0.051       | <b>0.754</b> | -0.129       | 0.648 |
| cg12074493           | -0.497        | 0.051        | 0.003         | 0.178        | <b>0.514</b> | 0.257        | 0.611 |
| cg18584905           | -0.077        | -0.099       | -0.158        | -0.248       | 0.105        | <b>0.835</b> | 0.811 |
| cg09921370           | 0.178         | 0.400        | 0.171         | 0.216        | -0.370       | <b>0.528</b> | 0.683 |
| Eigenvalue           | 6.630         | 4.154        | 2.386         | 1.829        | 1.505        | 1.263        |       |
| % variance explained | 26.519        | 16.615       | 9.543         | 7.316        | 6.018        | 5.051        |       |

37

38 Two associations were found between methylation components and personality dimensions that  
39 only approached significance after FDR correction (Table S3). Scores on Dominance showed a  
40 trend for a negative association with methylation scores on *SLC6A4* PC5 ( $t = -2.830$ ,  $df = 45$ ,  $p_{adj} =$   
41  $0.084$ ), while scores on Agreeableness approached a positive association with methylation scores  
42 of *HTR1A* PC2 ( $t = 0.148$ ,  $df = 45$ ,  $p_{adj} = 0.060$ ). For associations between the remaining components  
43 and personality dimensions see Table S3.

44

**Table S4:** Model statistics for *HTR1A* and *SLC6A4* CpG composite measure scores and their association with personality dimensions in chimpanzees

|               |                | Est           | SE           | t             | p            | p adj        |
|---------------|----------------|---------------|--------------|---------------|--------------|--------------|
| Dominance     | HTR_PC1        | -0.268        | 0.126        | -2.133        | 0.040        | 0.160        |
|               | HTR_PC2        | 0.177         | 0.114        | 1.554         | 0.129        | 0.310        |
|               | HTR_PC3        | -0.164        | 0.076        | -2.152        | 0.037        | 0.160        |
|               | HTR_PC4        | 0.024         | 0.101        | 0.237         | 0.814        | 0.888        |
|               | HTR_PC5        | 0.081         | 0.106        | 0.765         | 0.449        | 0.770        |
|               | HTR_PC6        | -0.030        | 0.088        | -0.336        | 0.739        | 0.887        |
|               | HTT_PC1        | -0.127        | 0.113        | -1.127        | 0.268        | 0.536        |
|               | HTT_PC2        | -0.089        | 0.144        | -0.619        | 0.540        | 0.810        |
|               | HTT_PC3        | -0.160        | 0.096        | -1.661        | 0.106        | 0.310        |
|               | HTT_PC4        | 0.044         | 0.096        | 0.460         | 0.648        | 0.864        |
|               | <b>HTT_PC5</b> | <b>-0.213</b> | <b>0.075</b> | <b>-2.830</b> | <b>0.007</b> | <b>0.084</b> |
|               | HTT_PC6        | -0.010        | 0.091        | -0.112        | 0.911        | 0.911        |
| Reactivity    | HTR_PC1        | -0.083        | 0.106        | -0.783        | 0.439        | 0.878        |
|               | HTR_PC2        | 0.023         | 0.096        | 0.235         | 0.816        | 0.880        |
|               | HTR_PC3        | -0.107        | 0.074        | -1.447        | 0.157        | 0.628        |
|               | HTR_PC4        | 0.134         | 0.086        | 1.567         | 0.126        | 0.628        |
|               | HTR_PC5        | -0.025        | 0.090        | -0.278        | 0.783        | 0.880        |
|               | HTR_PC6        | -0.161        | 0.063        | -2.566        | 0.014        | 0.168        |
|               | HTT_PC1        | -0.017        | 0.095        | -0.181        | 0.858        | 0.880        |
|               | HTT_PC2        | -0.019        | 0.122        | -0.152        | 0.880        | 0.880        |
|               | HTT_PC3        | -0.083        | 0.081        | -1.027        | 0.312        | 0.749        |
|               | HTT_PC4        | -0.102        | 0.081        | -1.255        | 0.218        | 0.654        |
|               | HTT_PC5        | -0.018        | 0.076        | -0.243        | 0.809        | 0.880        |
|               | HTT_PC6        | 0.046         | 0.077        | 0.602         | 0.551        | 0.880        |
| Agreeableness | HTR_PC1        | -0.106        | 0.054        | -1.958        | 0.056        | 0.224        |
|               | <b>HTR_PC2</b> | <b>0.148</b>  | <b>0.050</b> | <b>2.938</b>  | <b>0.005</b> | <b>0.060</b> |
|               | HTR_PC3        | -0.035        | 0.058        | -0.604        | 0.550        | 0.847        |
|               | HTR_PC4        | 0.089         | 0.067        | 1.339         | 0.189        | 0.454        |
|               | HTR_PC5        | 0.010         | 0.070        | 0.138         | 0.891        | 0.972        |
|               | HTR_PC6        | 0.024         | 0.058        | 0.417         | 0.679        | 0.847        |
|               | HTT_PC1        | -0.028        | 0.074        | -0.380        | 0.706        | 0.847        |
|               | HTT_PC2        | -0.049        | 0.095        | -0.519        | 0.607        | 0.847        |
|               | HTT_PC3        | -0.101        | 0.063        | -1.589        | 0.121        | 0.363        |
|               | HTT_PC4        | 0.053         | 0.064        | 0.829         | 0.413        | 0.826        |
|               | HTT_PC5        | 0.001         | 0.059        | 0.023         | 0.982        | 0.982        |
|               | HTT_PC6        | 0.120         | 0.060        | 1.999         | 0.053        | 0.224        |
| Extraversion  | HTR_PC1        | -0.067        | 0.107        | -0.631        | 0.532        | 0.919        |
|               | HTR_PC2        | 0.014         | 0.097        | 0.141         | 0.889        | 0.919        |
|               | HTR_PC3        | -0.104        | 0.074        | -1.398        | 0.171        | 0.919        |
|               | HTR_PC4        | 0.026         | 0.086        | 0.305         | 0.762        | 0.919        |
|               | HTR_PC5        | -0.009        | 0.090        | -0.102        | 0.919        | 0.919        |
|               | HTR_PC6        | -0.018        | 0.075        | -0.235        | 0.815        | 0.919        |
|               | HTT_PC1        | -0.084        | 0.096        | -0.880        | 0.385        | 0.919        |
|               | HTT_PC2        | 0.110         | 0.123        | 0.899         | 0.375        | 0.919        |
|               | HTT_PC3        | -0.017        | 0.082        | -0.207        | 0.837        | 0.919        |
|               | HTT_PC4        | -0.028        | 0.082        | -0.339        | 0.736        | 0.919        |
|               | HTT_PC5        | -0.014        | 0.076        | -0.182        | 0.856        | 0.919        |
|               | HTT_PC6        | 0.140         | 0.077        | 1.808         | 0.079        | 0.919        |
| Openness      | HTR_PC1        | -0.168        | 0.103        | -1.637        | 0.111        | 0.666        |

|         |        |       |        |       |       |
|---------|--------|-------|--------|-------|-------|
| HTR_PC2 | 0.105  | 0.093 | 1.132  | 0.265 | 0.668 |
| HTR_PC3 | -0.001 | 0.072 | -0.017 | 0.986 | 0.986 |
| HTR_PC4 | -0.022 | 0.083 | -0.270 | 0.789 | 0.861 |
| HTR_PC5 | 0.085  | 0.087 | 0.978  | 0.335 | 0.668 |
| HTR_PC6 | 0.043  | 0.072 | 0.593  | 0.557 | 0.668 |
| HTT_PC1 | -0.077 | 0.092 | -0.839 | 0.407 | 0.668 |
| HTT_PC2 | -0.093 | 0.118 | -0.786 | 0.437 | 0.668 |
| HTT_PC3 | 0.056  | 0.078 | 0.719  | 0.477 | 0.668 |
| HTT_PC4 | 0.053  | 0.079 | 0.670  | 0.507 | 0.668 |
| HTT_PC5 | -0.153 | 0.060 | -2.562 | 0.014 | 0.168 |
| HTT_PC6 | -0.088 | 0.074 | -1.185 | 0.244 | 0.668 |

Est = estimate, SE = Standard error, t = t-value, p = p value, boldface indicates p-value approaches significance

47

48

49

50

51

52

53

54

55

56

57

58

**Table S5:** Model statistics for *HTR1A* and *SLC6A4* CpG individual CpG methylation scores and their association with Dominance scores in chimpanzees

|               | cg probe          | Est            | SE            | t             | p             | p <sub>adj</sub> | sign      |
|---------------|-------------------|----------------|---------------|---------------|---------------|------------------|-----------|
| <i>HTR1A</i>  | cg13666507        | 5.054          | 3.856         | 1.311         | 0.201         | 0.603            |           |
|               | cg08259925        | 2.248          | 6.509         | 0.345         | 0.733         | 0.855            |           |
|               | cg16280141        | 2.809          | 4.313         | 0.651         | 0.521         | 0.855            |           |
|               | cg07839533        | -6.201         | 3.816         | -1.625        | 0.116         | 0.487            |           |
|               | cg16807523        | 0.872          | 3.651         | 0.239         | 0.813         | 0.899            |           |
|               | cg11432303        | 4.450          | 4.766         | 0.934         | 0.359         | 0.685            |           |
|               | cg17386123        | 10.192         | 4.979         | 2.047         | 0.051         | 0.357            |           |
|               | cg04694812        | 5.279          | 4.299         | 1.228         | 0.231         | 0.606            |           |
|               | cg10198270        | -12.668        | 7.718         | -1.641        | 0.113         | 0.487            |           |
|               | cg11615755        | 1.758          | 4.248         | 0.414         | 0.682         | 0.855            |           |
|               | cg08764163        | 5.965          | 2.007         | 2.972         | 0.005         | 0.053            |           |
|               | cg04427003        | -2.141         | 5.703         | -0.375        | 0.710         | 0.855            |           |
|               | cg02266732        | 5.980          | 6.333         | 0.944         | 0.354         | 0.685            |           |
|               | cg27420687        | 1.812          | 3.006         | 0.603         | 0.552         | 0.855            |           |
|               | cg04799838        | -1.440         | 3.666         | -0.393        | 0.698         | 0.855            |           |
|               | cg20598238        | -5.362         | 3.866         | -1.387        | 0.177         | 0.603            |           |
|               | cg15092168        | 0.224          | 6.431         | 0.035         | 0.972         | 0.978            |           |
|               | cg10588470        | -0.085         | 2.998         | -0.028        | 0.978         | 0.978            |           |
|               | <b>cg23448729</b> | <b>-6.611</b>  | <b>1.686</b>  | <b>-3.920</b> | <b>0.0003</b> | <b>0.006</b>     | <b>**</b> |
|               | cg27615388        | -5.663         | 4.933         | -1.148        | 0.261         | 0.609            |           |
|               | cg09698471        | -3.801         | 7.073         | -0.537        | 0.596         | 0.855            |           |
| <i>SLC6A4</i> | cg16647683        | -3.318         | 10.009        | -0.331        | 0.744         | 0.970            |           |
|               | cg00386645        | 8.135          | 9.090         | 0.895         | 0.381         | 0.856            |           |
|               | cg08743901        | -0.287         | 4.902         | -0.059        | 0.954         | 0.991            |           |
|               | cg10146136        | -2.893         | 10.325        | -0.280        | 0.782         | 0.970            |           |
|               | cg14312898        | -6.088         | 9.566         | -0.636        | 0.532         | 0.962            |           |
|               | cg20209182        | -10.085        | 7.873         | -1.281        | 0.215         | 0.856            |           |
|               | cg22584138        | -2.775         | 3.177         | -0.874        | 0.393         | 0.856            |           |
|               | cg26438554        | -5.409         | 14.666        | -0.369        | 0.716         | 0.970            |           |
|               | cg01330016        | 2.680          | 12.326        | 0.217         | 0.830         | 0.970            |           |
|               | cg05016953        | -4.494         | 14.337        | -0.313        | 0.757         | 0.970            |           |
|               | cg20592995        | -4.470         | 7.742         | -0.577        | 0.570         | 0.962            |           |
|               | cg25725890        | -0.133         | 17.481        | -0.008        | 0.994         | 0.994            |           |
|               | cg09921370        | 3.445          | 2.902         | 1.187         | 0.249         | 0.856            |           |
|               | cg18584905        | 1.622          | 9.231         | 0.176         | 0.862         | 0.970            |           |
|               | cg10241426        | 11.713         | 13.985        | 0.838         | 0.412         | 0.856            |           |
|               | cg01991100        | 7.804          | 8.630         | 0.904         | 0.377         | 0.856            |           |
|               | cg27427014        | 3.343          | 5.709         | 0.586         | 0.565         | 0.962            |           |
|               | cg05951817        | -2.373         | 2.605         | -0.911        | 0.373         | 0.856            |           |
|               | cg03363743        | 8.313          | 6.142         | 1.353         | 0.191         | 0.856            |           |
|               | cg06373684        | 8.314          | 17.168        | 0.484         | 0.633         | 0.970            |           |
|               | cg03829016        | 3.489          | 14.104        | 0.247         | 0.807         | 0.970            |           |
|               | cg06961290        | -9.729         | 8.114         | -1.199        | 0.245         | 0.856            |           |
|               | cg12074493        | -7.497         | 7.991         | -0.938        | 0.359         | 0.856            |           |
|               | cg06841846        | 9.248          | 7.082         | 1.306         | 0.206         | 0.856            |           |
|               | cg14692377        | 6.218          | 6.809         | 0.913         | 0.372         | 0.856            |           |
|               | <b>cg10901968</b> | <b>-50.871</b> | <b>14.475</b> | <b>-3.514</b> | <b>0.001</b>  | <b>0.027</b>     | <b>*</b>  |
|               | cg26741280        | -1.643         | 15.875        | -0.104        | 0.919         | 0.991            |           |

\* indicates  $p < 0.05$ , \*\* indicates  $p < 0.01$  (after FDR correction for multiple testing)

**Table S6:** Model statistics for *HTR1A* and *SLC6A4* individual CpG methylation scores and their association with Agreeableness scores in chimpanzees

|               | cg probe          | Est            | SE           | t             | p             | p <sub>adj</sub> | sign      |
|---------------|-------------------|----------------|--------------|---------------|---------------|------------------|-----------|
| <i>HTR1A</i>  | cg13666507        | -0.825         | 2.269        | -0.364        | 0.719         | 0.965            |           |
|               | cg08259925        | 0.872          | 3.830        | 0.228         | 0.822         | 0.965            |           |
|               | cg16280141        | -6.088         | 2.119        | -2.874        | 0.006         | 0.126            |           |
|               | cg07839533        | -0.107         | 2.245        | -0.048        | 0.962         | 0.990            |           |
|               | cg16807523        | -0.027         | 2.148        | -0.013        | 0.990         | 0.990            |           |
|               | cg11432303        | 3.848          | 1.838        | 2.093         | 0.043         | 0.151            |           |
|               | cg17386123        | 4.266          | 1.856        | 2.299         | 0.027         | 0.151            |           |
|               | cg04694812        | -4.236         | 1.762        | -2.404        | 0.021         | 0.151            |           |
|               | cg10198270        | -4.292         | 4.541        | -0.945        | 0.353         | 0.674            |           |
|               | cg11615755        | -2.700         | 2.499        | -1.080        | 0.290         | 0.609            |           |
|               | cg08764163        | -0.413         | 1.998        | -0.207        | 0.838         | 0.965            |           |
|               | cg04427003        | 3.652          | 3.355        | 1.089         | 0.286         | 0.609            |           |
|               | cg02266732        | -2.693         | 3.727        | -0.723        | 0.476         | 0.769            |           |
|               | cg27420687        | 2.101          | 1.769        | 1.188         | 0.246         | 0.609            |           |
|               | cg04799838        | -2.464         | 2.157        | -1.142        | 0.264         | 0.609            |           |
|               | cg20598238        | -0.759         | 2.275        | -0.334        | 0.741         | 0.965            |           |
|               | cg15092168        | -5.734         | 2.541        | -2.256        | 0.029         | 0.151            |           |
|               | cg10588470        | -0.285         | 1.764        | -0.162        | 0.873         | 0.965            |           |
|               | cg23448729        | 1.428          | 1.968        | 0.726         | 0.474         | 0.769            |           |
|               | cg27615388        | -0.765         | 2.902        | -0.264        | 0.794         | 0.965            |           |
|               | cg09698471        | 4.337          | 2.041        | 2.125         | 0.040         | 0.151            |           |
| <i>SLC6A4</i> | cg16647683        | -2.589         | 5.003        | -0.518        | 0.610         | 0.871            |           |
|               | cg00386645        | 2.192          | 4.543        | 0.483         | 0.635         | 0.871            |           |
|               | cg08743901        | -1.923         | 2.450        | -0.785        | 0.442         | 0.871            |           |
|               | cg10146136        | -8.705         | 5.161        | -1.687        | 0.107         | 0.413            |           |
|               | <b>cg14312898</b> | <b>8.298</b>   | <b>1.950</b> | <b>4.255</b>  | <b>0.0001</b> | <b>0.003</b>     | <b>**</b> |
|               | cg20209182        | 2.234          | 3.935        | 0.568         | 0.577         | 0.871            |           |
|               | <b>cg22584138</b> | <b>2.445</b>   | <b>0.798</b> | <b>3.064</b>  | <b>0.004</b>  | <b>0.022</b>     | <b>*</b>  |
|               | cg26438554        | 8.326          | 7.331        | 1.136         | 0.270         | 0.729            |           |
|               | cg01330016        | -1.558         | 6.161        | -0.253        | 0.803         | 0.903            |           |
|               | <b>cg05016953</b> | <b>13.141</b>  | <b>3.277</b> | <b>4.010</b>  | <b>0.0003</b> | <b>0.003</b>     | <b>**</b> |
|               | cg20592995        | 2.744          | 3.870        | 0.709         | 0.487         | 0.871            |           |
|               | cg25725890        | -5.757         | 8.738        | -0.659        | 0.518         | 0.871            |           |
|               | cg09921370        | -0.678         | 1.450        | -0.468        | 0.645         | 0.871            |           |
|               | cg18584905        | 0.609          | 4.614        | 0.132         | 0.896         | 0.924            |           |
|               | cg10241426        | 4.632          | 6.990        | 0.663         | 0.515         | 0.871            |           |
|               | cg01991100        | -0.418         | 4.313        | -0.097        | 0.924         | 0.924            |           |
|               | cg27427014        | 1.160          | 2.853        | 0.407         | 0.689         | 0.886            |           |
|               | cg05951817        | 0.460          | 1.302        | 0.353         | 0.728         | 0.893            |           |
|               | <b>cg03363743</b> | <b>-4.298</b>  | <b>1.484</b> | <b>-2.896</b> | <b>0.006</b>  | <b>0.027</b>     | <b>*</b>  |
|               | cg06373684        | -9.973         | 8.581        | -1.162        | 0.259         | 0.729            |           |
|               | cg03829016        | -1.189         | 7.050        | -0.169        | 0.868         | 0.924            |           |
|               | cg06961290        | 6.313          | 4.056        | 1.557         | 0.135         | 0.456            |           |
|               | cg12074493        | 3.151          | 3.994        | 0.789         | 0.439         | 0.871            |           |
|               | cg06841846        | -0.899         | 3.540        | -0.254        | 0.802         | 0.903            |           |
|               | cg14692377        | 1.885          | 3.403        | 0.554         | 0.586         | 0.871            |           |
|               | <b>cg10901968</b> | <b>-36.226</b> | <b>8.764</b> | <b>-4.133</b> | <b>0.0002</b> | <b>0.003</b>     | <b>**</b> |
|               | <b>cg26741280</b> | <b>14.496</b>  | <b>4.509</b> | <b>3.215</b>  | <b>0.0025</b> | <b>0.017</b>     | <b>*</b>  |

\* indicates  $p < 0.05$ , \*\* indicates  $p < 0.01$  (after FDR correction for multiple testing)



**Table S7:** Model statistics for *HTR1A* and *SLC6A4* CpG individual cpG scores and their association with Openness scores in chimpanzees

|               | cg probe          | Est           | SE           | t             | p            | p <sub>adj</sub> | sign |
|---------------|-------------------|---------------|--------------|---------------|--------------|------------------|------|
| <i>HTR1A</i>  | cg13666507        | -0.415        | 2.861        | -0.145        | 0.886        | 0.993            |      |
|               | cg08259925        | 3.640         | 4.829        | 0.754         | 0.458        | 0.962            |      |
|               | cg16280141        | -3.542        | 3.200        | -1.107        | 0.278        | 0.834            |      |
|               | cg07839533        | 4.074         | 2.831        | 1.439         | 0.162        | 0.680            |      |
|               | cg16807523        | 0.468         | 2.708        | 0.173         | 0.864        | 0.993            |      |
|               | cg11432303        | -0.186        | 3.536        | -0.053        | 0.958        | 0.993            |      |
|               | cg17386123        | 4.698         | 3.694        | 1.272         | 0.215        | 0.753            |      |
|               | cg04694812        | 0.199         | 3.190        | 0.062         | 0.951        | 0.993            |      |
|               | cg10198270        | 0.164         | 5.726        | 0.029         | 0.977        | 0.993            |      |
|               | cg11615755        | -5.439        | 3.152        | -1.726        | 0.096        | 0.530            |      |
|               | cg08764163        | 2.210         | 2.520        | 0.877         | 0.389        | 0.962            |      |
|               | cg04427003        | 1.684         | 4.231        | 0.398         | 0.694        | 0.993            |      |
|               | <b>cg02266732</b> | <b>8.676</b>  | <b>2.784</b> | <b>3.117</b>  | <b>0.003</b> | <b>0.032</b>     | *    |
|               | cg27420687        | -0.022        | 2.230        | -0.010        | 0.992        | 0.993            |      |
|               | cg04799838        | 2.155         | 2.720        | 0.792         | 0.435        | 0.962            |      |
|               | cg20598238        | 1.310         | 2.868        | 0.457         | 0.652        | 0.993            |      |
|               | cg15092168        | -8.108        | 4.772        | -1.699        | 0.101        | 0.530            |      |
|               | cg10588470        | -0.021        | 2.224        | -0.009        | 0.993        | 0.993            |      |
|               | cg23448729        | -1.309        | 2.481        | -0.528        | 0.602        | 0.993            |      |
|               | <b>cg27615388</b> | <b>-5.211</b> | <b>1.628</b> | <b>-3.201</b> | <b>0.003</b> | <b>0.032</b>     | *    |
|               | cg09698471        | 0.116         | 5.247        | 0.022         | 0.983        | 0.993            |      |
| <i>SLC6A4</i> | cg16647683        | -4.942        | 7.943        | -0.622        | 0.541        | 0.994            |      |
|               | cg00386645        | 10.690        | 7.213        | 1.482         | 0.154        | 0.994            |      |
|               | cg08743901        | 1.824         | 3.890        | 0.469         | 0.644        | 0.994            |      |
|               | cg10146136        | -7.630        | 8.193        | -0.931        | 0.363        | 0.994            |      |
|               | cg14312898        | -6.883        | 7.591        | -0.907        | 0.375        | 0.994            |      |
|               | cg20209182        | -7.696        | 6.248        | -1.232        | 0.232        | 0.994            |      |
|               | cg22584138        | -2.796        | 2.521        | -1.109        | 0.280        | 0.994            |      |
|               | cg26438554        | 1.800         | 11.638       | 0.155         | 0.879        | 0.994            |      |
|               | cg01330016        | 5.335         | 9.781        | 0.545         | 0.591        | 0.994            |      |
|               | cg05016953        | -2.058        | 11.377       | -0.181        | 0.858        | 0.994            |      |
|               | cg20592995        | -2.498        | 6.143        | -0.407        | 0.689        | 0.994            |      |
|               | cg25725890        | -14.636       | 7.042        | -2.079        | 0.043        | 0.581            |      |
|               | cg09921370        | 0.832         | 2.303        | 0.361         | 0.722        | 0.994            |      |
|               | cg18584905        | -4.173        | 7.325        | -0.570        | 0.575        | 0.994            |      |
|               | cg10241426        | 3.382         | 11.098       | 0.305         | 0.764        | 0.994            |      |
|               | cg01991100        | 6.751         | 6.848        | 0.986         | 0.336        | 0.994            |      |
|               | cg27427014        | -0.157        | 4.530        | -0.035        | 0.973        | 0.994            |      |
|               | cg05951817        | 0.307         | 2.067        | 0.149         | 0.883        | 0.994            |      |
|               | cg03363743        | 2.356         | 4.874        | 0.483         | 0.634        | 0.994            |      |
|               | cg06373684        | 1.342         | 13.623       | 0.099         | 0.923        | 0.994            |      |
|               | cg03829016        | -0.083        | 11.192       | -0.007        | 0.994        | 0.994            |      |
|               | cg06961290        | 1.126         | 6.438        | 0.175         | 0.863        | 0.994            |      |
|               | cg12074493        | 3.141         | 6.341        | 0.495         | 0.626        | 0.994            |      |
|               | cg06841846        | -1.828        | 5.620        | -0.325        | 0.748        | 0.994            |      |
|               | cg14692377        | 2.897         | 5.403        | 0.536         | 0.598        | 0.994            |      |
|               | cg10901968        | -30.545       | 11.179       | -2.732        | 0.009        | 0.243            |      |
|               | cg26741280        | -1.175        | 12.597       | -0.093        | 0.927        | 0.994            |      |

\* indicates  $p < 0.05$  (after FDR correction for multiple testing)

**Table S8:** Model statistics for *HTR1A* and *SLC6A4* CpG individual cpG scores and their association with Reactivity scores in chimpanzees

|               | cg probe          | Est           | SE           | t             | p             | p <sub>adj</sub> | sign      |
|---------------|-------------------|---------------|--------------|---------------|---------------|------------------|-----------|
| <i>HTR1A</i>  | cg13666507        | 4.058         | 1.566        | 2.591         | 0.013         | 0.063            |           |
|               | cg08259925        | -0.822        | 4.714        | -0.174        | 0.863         | 0.863            |           |
|               | cg16280141        | 6.665         | 2.566        | 2.598         | 0.013         | 0.063            |           |
|               | cg07839533        | -2.063        | 2.764        | -0.746        | 0.462         | 0.693            |           |
|               | cg16807523        | -4.549        | 2.091        | -2.175        | 0.036         | 0.126            |           |
|               | cg11432303        | -5.828        | 2.286        | -2.549        | 0.015         | 0.063            |           |
|               | cg17386123        | 6.489         | 2.504        | 2.592         | 0.013         | 0.063            |           |
|               | cg04694812        | 2.642         | 3.114        | 0.849         | 0.404         | 0.653            |           |
|               | cg10198270        | -3.121        | 5.590        | -0.558        | 0.581         | 0.813            |           |
|               | cg11615755        | 4.057         | 3.077        | 1.319         | 0.199         | 0.464            |           |
|               | cg08764163        | 3.084         | 1.514        | 2.037         | 0.048         | 0.144            |           |
|               | cg04427003        | 0.983         | 4.130        | 0.238         | 0.814         | 0.855            |           |
|               | cg02266732        | 4.489         | 4.587        | 0.979         | 0.337         | 0.590            |           |
|               | cg27420687        | -0.671        | 2.177        | -0.308        | 0.760         | 0.840            |           |
|               | cg04799838        | -3.242        | 2.655        | -1.221        | 0.233         | 0.489            |           |
|               | cg20598238        | -1.322        | 2.800        | -0.472        | 0.641         | 0.818            |           |
|               | cg15092168        | 5.312         | 4.658        | 1.140         | 0.265         | 0.506            |           |
|               | cg10588470        | -0.797        | 2.171        | -0.367        | 0.717         | 0.837            |           |
|               | cg23448729        | 1.069         | 2.422        | 0.442         | 0.662         | 0.818            |           |
|               | <b>cg27615388</b> | <b>-7.228</b> | <b>1.640</b> | <b>-4.407</b> | <b>0.0001</b> | <b>0.002</b>     | <b>**</b> |
|               | cg09698471        | -9.503        | 5.123        | -1.855        | 0.075         | 0.197            |           |
| <i>SLC6A4</i> | cg16647683        | -2.810        | 8.866        | -0.317        | 0.755         | 0.932            |           |
|               | cg00386645        | 9.269         | 8.051        | 1.151         | 0.263         | 0.822            |           |
|               | cg08743901        | 3.815         | 4.342        | 0.878         | 0.390         | 0.932            |           |
|               | cg10146136        | -0.785        | 9.146        | -0.086        | 0.932         | 0.932            |           |
|               | cg14312898        | -4.901        | 8.473        | -0.578        | 0.570         | 0.932            |           |
|               | cg20209182        | -8.656        | 6.974        | -1.241        | 0.229         | 0.822            |           |
|               | cg22584138        | -0.814        | 2.814        | -0.289        | 0.775         | 0.932            |           |
|               | cg26438554        | -17.251       | 12.991       | -1.328        | 0.199         | 0.822            |           |
|               | cg01330016        | -2.379        | 10.918       | -0.218        | 0.830         | 0.932            |           |
|               | cg05016953        | -24.391       | 12.700       | -1.921        | 0.069         | 0.822            |           |
|               | cg20592995        | -2.089        | 6.857        | -0.305        | 0.764         | 0.932            |           |
|               | cg25725890        | -1.760        | 15.484       | -0.114        | 0.911         | 0.932            |           |
|               | cg09921370        | 2.996         | 2.570        | 1.166         | 0.258         | 0.822            |           |
|               | cg18584905        | 5.239         | 8.177        | 0.641         | 0.529         | 0.932            |           |
|               | cg10241426        | 4.642         | 12.388       | 0.375         | 0.712         | 0.932            |           |
|               | cg01991100        | 1.147         | 7.644        | 0.150         | 0.882         | 0.932            |           |
|               | cg27427014        | 0.911         | 5.057        | 0.180         | 0.859         | 0.932            |           |
|               | cg05951817        | -2.276        | 2.308        | -0.986        | 0.336         | 0.907            |           |
|               | cg03363743        | 6.119         | 5.441        | 1.125         | 0.274         | 0.822            |           |
|               | cg06373684        | 19.159        | 15.207       | 1.260         | 0.222         | 0.822            |           |
|               | cg03829016        | 3.702         | 12.493       | 0.296         | 0.770         | 0.932            |           |
|               | cg06961290        | -14.380       | 7.187        | -2.001        | 0.059         | 0.822            |           |
|               | cg12074493        | -2.509        | 7.078        | -0.355        | 0.727         | 0.932            |           |
|               | cg06841846        | 2.250         | 6.273        | 0.359         | 0.724         | 0.932            |           |
|               | cg14692377        | 7.821         | 6.031        | 1.297         | 0.210         | 0.822            |           |
|               | cg10901968        | -18.198       | 32.040       | -0.568        | 0.576         | 0.932            |           |
|               | cg26741280        | -2.850        | 14.062       | -0.203        | 0.841         | 0.932            |           |

\*\* indicates  $p < 0.01$  (after FDR correction for multiple testing)

**Table S9:** Model statistics for *HTR1A* and *SLC6A4* CpG individual cpG scores and their association with Extraversion scores in chimpanzees

|               | cg probe   | Est     | SE     | t      | p     | p <sub>adj</sub> | sign |
|---------------|------------|---------|--------|--------|-------|------------------|------|
| <i>HTR1A</i>  | cg13666507 | 1.829   | 3.245  | 0.564  | 0.578 | 0.934            |      |
|               | cg08259925 | -1.137  | 5.478  | -0.208 | 0.837 | 0.974            |      |
|               | cg16280141 | -3.105  | 3.630  | -0.855 | 0.400 | 0.933            |      |
|               | cg07839533 | 2.438   | 3.212  | 0.759  | 0.455 | 0.934            |      |
|               | cg16807523 | -0.305  | 3.072  | -0.099 | 0.922 | 0.974            |      |
|               | cg11432303 | 0.182   | 4.011  | 0.045  | 0.964 | 0.974            |      |
|               | cg17386123 | 1.475   | 4.191  | 0.352  | 0.728 | 0.974            |      |
|               | cg04694812 | 2.162   | 3.618  | 0.597  | 0.555 | 0.934            |      |
|               | cg10198270 | -1.001  | 6.495  | -0.154 | 0.879 | 0.974            |      |
|               | cg11615755 | -3.152  | 3.575  | -0.882 | 0.386 | 0.933            |      |
|               | cg08764163 | -3.823  | 2.858  | -1.338 | 0.193 | 0.933            |      |
|               | cg04427003 | 0.285   | 4.799  | 0.059  | 0.953 | 0.974            |      |
|               | cg02266732 | -1.730  | 5.330  | -0.325 | 0.748 | 0.974            |      |
|               | cg27420687 | 1.609   | 2.530  | 0.636  | 0.530 | 0.934            |      |
|               | cg04799838 | -0.101  | 3.086  | -0.033 | 0.974 | 0.974            |      |
|               | cg20598238 | 3.764   | 1.461  | 2.576  | 0.013 | 0.273            |      |
|               | cg15092168 | -5.945  | 5.413  | -1.098 | 0.282 | 0.933            |      |
|               | cg10588470 | 2.404   | 2.523  | 0.953  | 0.349 | 0.933            |      |
|               | cg23448729 | -2.507  | 1.222  | -2.051 | 0.046 | 0.483            |      |
|               | cg27615388 | -3.817  | 4.151  | -0.919 | 0.366 | 0.933            |      |
|               | cg09698471 | 6.404   | 5.953  | 1.076  | 0.292 | 0.933            |      |
| <i>SLC6A4</i> | cg16647683 | -10.882 | 8.829  | -1.233 | 0.232 | 0.947            |      |
|               | cg00386645 | -2.217  | 8.018  | -0.276 | 0.785 | 0.947            |      |
|               | cg08743901 | 3.969   | 4.324  | 0.918  | 0.370 | 0.947            |      |
|               | cg10146136 | -2.987  | 9.108  | -0.328 | 0.746 | 0.947            |      |
|               | cg14312898 | 2.663   | 8.438  | 0.316  | 0.756 | 0.947            |      |
|               | cg20209182 | -6.211  | 6.945  | -0.894 | 0.382 | 0.947            |      |
|               | cg22584138 | -1.089  | 2.802  | -0.389 | 0.702 | 0.947            |      |
|               | cg26438554 | 13.803  | 12.937 | 1.067  | 0.299 | 0.947            |      |
|               | cg01330016 | 5.948   | 10.873 | 0.547  | 0.590 | 0.947            |      |
|               | cg05016953 | 9.518   | 12.647 | 0.753  | 0.460 | 0.947            |      |
|               | cg20592995 | 2.196   | 6.829  | 0.321  | 0.751 | 0.947            |      |
|               | cg25725890 | -9.177  | 15.420 | -0.595 | 0.558 | 0.947            |      |
|               | cg09921370 | -0.173  | 2.560  | -0.067 | 0.947 | 0.947            |      |
|               | cg18584905 | 9.861   | 8.143  | 1.211  | 0.240 | 0.947            |      |
|               | cg10241426 | 2.724   | 12.337 | 0.221  | 0.828 | 0.947            |      |
|               | cg01991100 | 6.665   | 7.612  | 0.876  | 0.392 | 0.947            |      |
|               | cg27427014 | -1.278  | 5.036  | -0.254 | 0.802 | 0.947            |      |
|               | cg05951817 | 0.206   | 2.298  | 0.090  | 0.930 | 0.947            |      |
|               | cg03363743 | -0.391  | 5.418  | -0.072 | 0.943 | 0.947            |      |
|               | cg06373684 | 3.034   | 15.144 | 0.200  | 0.843 | 0.947            |      |
|               | cg03829016 | -8.272  | 12.442 | -0.665 | 0.514 | 0.947            |      |
|               | cg06961290 | 1.214   | 7.157  | 0.170  | 0.867 | 0.947            |      |
|               | cg12074493 | 6.438   | 7.049  | 0.913  | 0.372 | 0.947            |      |
|               | cg06841846 | 1.303   | 6.248  | 0.209  | 0.837 | 0.947            |      |
|               | cg14692377 | -4.524  | 6.006  | -0.753 | 0.460 | 0.947            |      |
|               | cg10901968 | -34.488 | 31.907 | -1.081 | 0.293 | 0.947            |      |
|               | cg26741280 | 3.108   | 14.003 | 0.222  | 0.827 | 0.947            |      |
