# Supplementary material for: The Role of Serotonergic Gene Methylation in Regulating Anxiety-Related Personality Traits in Chimpanzees
Source: Preprints.org preprint supplement (doi:10.20944/preprints202210.0428.v1), 2022-10-27
Supplement: Supplementary file 1 [file Table S10-S11.xlsx]

## Sheet: Table S10
Table S10: Dataset with individual name, sex, age at personality rating, age at blood, relatedness coefficient, personality dimension scores (Reac=Reactivity, dom=Dominance, ope=Openess,ext=Extraversion, agr=Agreeableness), Principal Compont scores for each component for HTT (=serotonin transporter) or HTR (=serotonin receptor) and individual CpG site scores
Name	sex	age	ageblood	relatedness	reac	dom	ope	ext	agr	HTT_PC1	HTT_PC2	HTT_PC3	HTT_PC4	HTT_PC5	HTT_PC6	HTR_PC1	HTR_PC2	HTR_PC3	HTR_PC4	HTR_PC5	HTR_PC6	HTT_cg10	HTT_cg22	cg10901968	cg26741280	cg12074493	cg20598238	cg08764163	cg11615755	cg16807523	cg13666507	cg08259925	cg16280141	cg07839533	cg16807523	cg11432303	cg17386123	cg04694812	cg10198270	cg11615755	cg08764163	cg04427003	cg02266732	cg27420687	cg04799838	cg20598238	cg15092168	cg10588470	cg23448729
ADO	2	37	37	0.006	3.186	3.70375	3.77833	3.65833	3.375	0.65361	0.24379	-2.5568	-0.08492	0.19783	0.49209	0.17586	-0.00108	1.5142	-0.49379	0.62718	1.75169	0.8971	0.8955	0.0482654	0.0598063	0.12404	0.175272	0.213518	0.189926	0.206768	0.0813441	0.148974	0.151913	0.174565	0.206768	0.286843	0.35567	0.22733	0.270396	0.189926	0.213518	0.130629	0.155072	0.344066	0.193124	0.175272	0.160608	0.268487	0.226543
AHN	1	17	17	0.014	3.1607	3.145	4.49	4.0767	3.895	0.18673	-0.44743	0.94489	0.42746	0.10284	-0.95469	2.20816	0.7197	0.35632	0.55868	0.62333	2.52354	0.8861	0.9023	0.0436558	0.0566698	0.125569	0.187559	0.278189	0.212862	0.210088	0.0873364	0.126912	0.129	0.206295	0.210088	0.309295	0.351793	0.24301	0.306782	0.212862	0.278189	0.190243	0.181297	0.354337	0.236874	0.187559	0.127821	0.368394	0.368952
AKI	2	32	32	0.021	4.6267	4.6888	5.0917	4.85	3.695	-1.45895	1.25047	-0.86961	-0.76583	-1.28739	-0.62708	0.27347	-0.47318	0.87944	-0.67123	0.16789	-1.33866	0.8958	0.9131	0.0375637	0.0547833	0.137028	0.177619	0.193995	0.165933	0.141262	0.0893864	0.134783	0.134163	0.187077	0.141262	0.276218	0.317835	0.218294	0.256649	0.165933	0.193995	0.127384	0.0934046	0.233059	0.175135	0.177619	0.122865	0.30803	0.261373
ALE	2	27	27	0.015	3.9907	4.93	4.7383	5.0883	4.765	-1.03515	1.25241	-0.31134	0.00763	-0.71694	0.42824	0.66358	3.69224	-0.2314	-1.02187	-1.04477	-1.29783	0.872	0.8693	0.0411128	0.0692371	0.110878	0.343064	0.297094	0.197811	0.25546	0.100019	0.154989	0.139979	0.119206	0.25546	0.313503	0.346634	0.19826	0.237643	0.197811	0.297094	0.154663	0.0901325	0.313505	0.169953	0.343064	0.100284	0.275341	0.330132
ALP	1	27	27	0.008	3.7847	4.3713	5.4883	4.4617	4.625	-0.49297	0.91839	1.33235	-0.15871	-2.28911	0.14952	-1.18743	1.07042	1.42485	0.97157	-0.72322	0.74401	0.8787	0.8786	0.0289319	0.0539248	0.0998706	0.242103	0.307142	0.118441	0.170058	0.0811999	0.155019	0.0709144	0.170623	0.170058	0.315387	0.346141	0.170629	0.305718	0.118441	0.307142	0.113983	0.161169	0.344069	0.130351	0.242103	0.130006	0.308338	0.29914
AUS	2	20	20	0.061	3.9707	4.1913	4.525	4.59	4.5	0.85348	-0.71582	0.16067	-0.59139	-0.95099	-0.57274	-1.57915	0.04988	-1.20383	0.05432	0.27982	-0.87771	0.89	0.8774	0.0354062	0.0569121	0.0979155	0.194092	0.181577	0.129553	0.144013	0.0588948	0.0837357	0.110497	0.127848	0.144013	0.325829	0.341383	0.157953	0.259244	0.129553	0.181577	0.106226	0.0811028	0.325464	0.139023	0.194092	0.0982274	0.197366	0.198364
BAR	2	22	22	0.033	3.314	4.285	4.4383	4.9233	5.135	1.73338	0.39769	-0.04628	0.72837	1.1708	0.51645	0.56524	0.90519	-0.52984	-0.46624	1.72262	-0.25816	0.8799	0.9109	0.046414	0.070294	0.144661	0.234625	0.202656	0.157115	0.20404	0.0705592	0.113774	0.147247	0.181289	0.20404	0.333986	0.387491	0.220816	0.268795	0.157115	0.202656	0.133777	0.120205	0.323529	0.220827	0.234625	0.107711	0.290805	0.287646
BEC	1	20	20	0.006	3.382	3.5363	4.955	4.7017	4.46	-0.39907	0.46219	2.1701	1.31621	0.68489	0.72849	-0.44872	0.50248	-0.51202	0.4764	-0.69973	-0.90749	0.8938	0.8974	0.0448668	0.0601127	0.134643	0.238635	0.211077	0.152669	0.170632	0.100161	0.124221	0.0966343	0.161689	0.170632	0.270984	0.326593	0.182125	0.259372	0.152669	0.211077	0.117324	0.111757	0.35704	0.15964	0.238635	0.083571	0.293662	0.203438
BER	1	34	34	0.015	3.5607	3.4175	4.6317	3.72	4.225	0.50381	-1.26282	-0.09635	2.51311	-0.86013	-1.23926	1.29967	-0.34385	0.04899	0.66007	0.24659	0.64984	0.8736	0.8928	0.038855	0.0593155	0.127623	0.175349	0.232306	0.162762	0.17334	0.105617	0.137412	0.126451	0.192322	0.17334	0.304291	0.326633	0.205385	0.268499	0.162762	0.232306	0.180863	0.133307	0.345548	0.234322	0.175349	0.11721	0.316988	0.282688
BET	1	38	38	0.011	4.384	4.7688	4.49	4.305	4.665	1.98916	1.12676	-0.83373	0.8911	-0.03411	0.10649	-0.94803	2.8935	1.31637	0.91945	-0.87791	0.60732	0.9108	0.8885	0.0401521	0.054415	0.106132	0.310253	0.279398	0.255834	0.185564	0.0975305	0.153339	0.112355	0.155244	0.185564	0.335254	0.376745	0.159768	0.291624	0.255834	0.279398	0.115122	0.147329	0.402787	0.132562	0.310253	0.14297	0.309169	0.280857
BIL	2	19	19	0.02	4.118	4.2438	4.41	4.905	4.45	-0.86459	-0.93803	0.31557	-1.84761	0.24424	-0.86217	0.49874	-0.82105	-0.93705	-0.58416	-1.55917	-0.30549	0.8588	0.8963	0.0400696	0.0675871	0.136602	0.161289	0.163302	0.174378	0.11124	0.0940612	0.11362	0.0935854	0.143568	0.11124	0.233498	0.272903	0.227085	0.24394	0.174378	0.163302	0.125225	0.0882438	0.292084	0.178418	0.161289	0.0761004	0.243634	0.19346
BO	2	19	19	0.027	4.416	4.7425	4.8533	5.1217	4.25	-1.302	0.54207	1.53244	-0.6257	1.12211	-0.56155	-0.7071	0.07409	-0.91591	0.07341	0.19522	-0.31974	0.8846	0.8789	0.0443217	0.0815158	0.142414	0.22808	0.14986	0.152922	0.168898	0.125687	0.111657	0.103777	0.166064	0.168898	0.303853	0.326816	0.195168	0.26504	0.152922	0.14986	0.102662	0.1323	0.273647	0.133674	0.22808	0.0661217	0.263225	0.213829
CAS	1	23	23	0.014	3.5	3.35	4.3217	4.5117	4.5	-1.39223	0.48936	0.20313	0.04622	0.30491	0.08817	0.6281	0.35191	0.50805	1.06127	-0.35639	1.2434	0.8634	0.8685	0.0411695	0.0725941	0.164088	0.220396	0.277341	0.195219	0.128985	0.117419	0.140001	0.123295	0.221341	0.128985	0.332182	0.300119	0.208611	0.255842	0.195219	0.277341	0.121288	0.151871	0.381971	0.215049	0.220396	0.121878	0.317782	0.315628
CHE	2	16	16	0.018	4.5613	4.8025	5.0283	5.4733	4.665	0.8298	-0.9783	1.51814	-1.00789	-0.76732	3.94867	-1.714	1.1149	-0.44495	-1.88034	-0.89897	0.54735	0.8876	0.8547	0.0364027	0.0479813	0.122591	0.262809	0.168993	0.180579	0.146654	0.0781135	0.0972883	0.085729	0.131283	0.146654	0.283251	0.379088	0.206788	0.24205	0.180579	0.168993	0.0903903	0.131692	0.22946	0.112535	0.262809	0.0946916	0.203619	0.122814
CHI	2	24	24	0.028	4.5033	3.9775	4.7433	5.1817	4.255	-2.03411	-0.31388	-0.81136	-0.81554	-0.02867	0.04143	0.52469	-1.52657	1.26447	-0.32861	0.21803	-0.12057	0.8835	0.8766	0.0414368	0.0700929	0.1582	0.166618	0.119155	0.166038	0.128204	0.128155	0.148559	0.143925	0.212486	0.128204	0.249258	0.333126	0.212247	0.249652	0.166038	0.119155	0.147767	0.126774	0.280087	0.195179	0.166618	0.119244	0.278964	0.259293
CHR	1	42	42	0.014	3.5633	4.1338	3.98	3.9617	4	-0.95142	-0.76168	-1.28712	1.05745	1.63043	-0.6455	1.70927	-0.59346	-1.19595	-0.04787	0.27119	-0.42187	0.8646	0.8767	0.0477611	0.0859127	0.143621	0.157144	0.164284	0.161931	0.141839	0.111637	0.124425	0.138676	0.14848	0.141839	0.279001	0.322724	0.250843	0.248591	0.161931	0.164284	0.146474	0.112446	0.343226	0.207764	0.157144	0.0856621	0.330526	0.285663
CYB	1	57	57	0.008	3.5153	2.7675	3.99	4.5117	3.695	-0.9797	0.36414	0.72472	0.66758	1.06123	1.69826	1.1873	-0.71291	-0.20698	-0.08124	0.19797	-1.26261	0.8773	0.8901	0.0435227	0.069621	0.164382	0.181353	0.155936	0.137778	0.179546	0.106987	0.12379	0.126053	0.159715	0.179546	0.278577	0.307836	0.229772	0.261869	0.137778	0.155936	0.157052	0.11004	0.277177	0.195378	0.181353	0.103606	0.404313	0.257258
COY	2	29	29	0.019	3.6573	4.625	4.7117	4.845	4.67	0.99127	1.37139	-0.57026	-0.67146	-0.14626	0.96428	-1.17781	-0.45475	0.87527	-0.33254	1.21783	1.51347	0.8767	0.8639	0.0400719	0.0695442	0.111929	0.205747	0.17623	0.126869	0.184534	0.0781898	0.144805	0.159325	0.179911	0.184534	0.325774	0.344283	0.204173	0.277245	0.126869	0.17623	0.141426	0.144632	0.321278	0.131975	0.205747	0.127196	0.20273	0.229179
EHS	2	17	17	0.018	3.9327	4.7963	4.9567	5.0117	4.165	-0.50253	-1.86799	0.66018	-0.95512	-1.1657	-1.07408	-0.23062	-1.23264	-1.07227	-0.54165	-0.75886	0.21141	0.87	0.9005	0.0313337	0.0654504	0.10185	0.137972	0.137715	0.122413	0.126221	0.0765233	0.107543	0.118159	0.10596	0.126221	0.259714	0.299673	0.175227	0.246036	0.122413	0.137715	0.102561	0.127091	0.270024	0.165035	0.137972	0.0835	0.272393	0.201909
EMI	1	28	28	0.011	3.9653	4.5338	4.455	4.2217	4.22	-0.25164	-1.11204	-0.23445	2.16364	-0.40741	1.39318	0.90566	0.0801	-0.64002	-0.65365	0.50893	0.13392	0.8668	0.8709	0.0370731	0.069061	0.133141	0.173622	0.191976	0.149672	0.158774	0.0857938	0.144725	0.131722	0.147214	0.158774	0.30836	0.374557	0.228379	0.250234	0.149672	0.191976	0.141209	0.125939	0.317416	0.203675	0.173622	0.0874149	0.323339	0.232199
GIS	2	20	20	0.015	3.9887	4.4838	5.2883	5.1333	4.485	2.33387	0.50921	0.25671	0.47442	-1.21526	-0.5293	-1.34801	0.28974	-2.61249	0.16405	1.84942	3.06431	0.8579	0.9114	0.0343896	0.0578816	0.117801	0.247364	0.183104	0.152061	0.152152	0.0571713	0.091348	0.166465	0.128782	0.152152	0.38958	0.349407	0.207598	0.300398	0.152061	0.183104	0.12875	0.188318	0.332336	0.146508	0.247364	0.0769463	0.192122	0.167235
GRA	1	20	20	0.017	4.3527	4.1463	4.835	4.895	4.305	0.26282	-2.23628	-0.29779	-0.25655	0.00594	-0.56221	0.52168	-1.47029	-0.16551	-0.61359	-1.52329	-0.8476	0.849	0.8999	0.0441976	0.0567667	0.103578	0.126647	0.145012	0.12391	0.110266	0.0827778	0.126098	0.0945824	0.121577	0.110266	0.244354	0.298164	0.160867	0.241109	0.12391	0.145012	0.12588	0.106003	0.226086	0.24661	0.126647	0.101816	0.298592	0.225651
HOB	2	22	22	0.02	3.3933	4.8875	4.8	5	4.75	0.6049	-0.68218	-0.45846	0.15902	-1.70351	0.02248	1.13054	-0.64071	-0.11767	0.8144	-0.06613	1.17522	0.8826	0.9016	0.0348331	0.0550176	0.11255	0.208988	0.197468	0.15418	0.1682	0.100952	0.123996	0.114706	0.195309	0.1682	0.30652	0.310918	0.203569	0.253796	0.15418	0.197468	0.192656	0.132395	0.401546	0.234522	0.208988	0.13021	0.326087	0.221796
HUE	2	22	22	0.006	4.508	4.4113	4.355	4.6333	4	-0.3251	-0.43497	0.04948	-0.12522	-0.68568	0.72151	-0.11421	-1.02606	-0.02612	-0.22631	0.42525	-0.62558	0.8832	0.8736	0.0420363	0.0566089	0.110171	0.149129	0.184721	0.142268	0.100258	0.0772195	0.108595	0.12297	0.163861	0.100258	0.292654	0.340891	0.22888	0.258488	0.142268	0.184721	0.120769	0.104541	0.297313	0.156413	0.149129	0.122634	0.32851	0.212979
HUH	2	18	18	0.022	3.7893	3.9938	4.6483	4.575	4.12	1.30804	-0.78909	0.19007	0.68627	-0.04589	-1.24367	0.68999	0.54932	-0.90665	0.13075	0.98654	-1.06391	0.8923	0.8749	0.041315	0.066038	0.0938674	0.216967	0.211801	0.144829	0.196578	0.0751367	0.113539	0.109006	0.173488	0.196578	0.289644	0.364874	0.212139	0.272954	0.144829	0.211801	0.11871	0.119973	0.335528	0.226037	0.216967	0.0969108	0.299699	0.270671
JAK	2	22	22	0.027	3.7587	3.8913	4.575	4.5767	4.2	-0.45647	-0.96608	0.33397	-0.92921	-1.07431	-1.11317	-0.7502	-0.74942	-0.81998	-0.50598	-1.65621	0.52577	0.8724	0.8756	0.0360106	0.0582656	0.103707	0.181306	0.153491	0.132499	0.123908	0.0608412	0.119162	0.108779	0.109922	0.123908	0.280945	0.275729	0.157639	0.235961	0.132499	0.153491	0.130556	0.125574	0.285191	0.13669	0.181306	0.0853325	0.273297	0.189845
JUD	2	22	22	0.02	4.7153	4.86	5.6267	4.585	3.67	0.52558	-0.43734	1.85786	1.11538	0.94824	-2.33727	-0.5658	-0.67583	-0.74649	0.65715	0.42418	-0.52174	0.8832	0.8896	0.0398017	0.0749268	0.125215	0.190741	0.206046	0.126801	0.140357	0.0912576	0.127028	0.148007	0.161824	0.140357	0.297301	0.303792	0.183765	0.267404	0.126801	0.206046	0.115053	0.124254	0.325018	0.16439	0.190741	0.0877065	0.285665	0.217751
KAK	1	32	32	0.007	3.7333	3.4788	3.7083	4.0417	3.96	0.57432	1.88117	0.5403	-0.89337	-1.00403	-0.45925	-1.38714	-0.39812	1.59803	1.02107	-0.37347	-0.50773	0.8793	0.8988	0.0352985	0.0521428	0.0912508	0.186574	0.188332	0.181345	0.11899	0.0902805	0.133754	0.0879614	0.186978	0.11899	0.30811	0.334886	0.153161	0.282085	0.181345	0.188332	0.112375	0.114756	0.332394	0.135316	0.186574	0.148386	0.2877	0.228129
KAY	1	22	22	0.006	3.0267	3.8	4.9333	5.3667	4.6	0.17221	1.15538	1.32856	1.50403	0.47511	-0.21503	-1.59037	0.77786	1.82577	-0.58062	-0.12312	0.24825	0.8824	0.9023	0.0447377	0.0625774	0.131033	0.243001	0.191759	0.14337	0.173613	0.0785957	0.19627	0.107923	0.156947	0.173613	0.364896	0.336385	0.182922	0.270858	0.14337	0.191759	0.100517	0.126542	0.274966	0.127701	0.243001	0.12212	0.264522	0.214794
KEN	2	21	21	0.006	5.018	5.215	5.4067	5.165	3.74	1.44292	0.724	-0.47792	-0.81707	-0.31196	-1.08497	-1.26604	-0.16543	-0.47206	0.04993	0.9698	0.12066	0.8709	0.8715	0.0420544	0.0535647	0.108111	0.197099	0.265223	0.151043	0.194827	0.0694747	0.0934295	0.134437	0.222533	0.194827	0.296605	0.328815	0.205174	0.23873	0.151043	0.265223	0.118585	0.127203	0.340369	0.143531	0.197099	0.111161	0.202719	0.165993
LAC	1	24	24	0.011	3.678	3.4375	4	3.8617	4.165	0.13203	-0.90099	0.52835	-0.38327	3.09871	0.08271	0.35991	-0.16174	-0.46708	-0.94918	-0.15587	-1.08173	0.8513	0.9119	0.0563848	0.096619	0.14144	0.200696	0.191535	0.125397	0.142446	0.0779442	0.125326	0.134305	0.133553	0.142446	0.260983	0.322667	0.217072	0.2486	0.125397	0.191535	0.117192	0.11082	0.251784	0.17017	0.200696	0.100348	0.306207	0.256396
LEX	1	13	13	0.006	4.526	3.365	4.56	5.2967	4.055	-1.46863	1.03116	0.20884	-0.51032	1.45138	0.31798	1.16494	0.88187	0.83386	1.61994	-1.27319	-0.65799	0.8677	0.8651	0.0495721	0.0802294	0.156074	0.223823	0.23589	0.177763	0.158196	0.144701	0.140434	0.0785725	0.159442	0.158196	0.274335	0.327902	0.180961	0.289752	0.177763	0.23589	0.14411	0.10958	0.402253	0.177516	0.223823	0.121479	0.372676	0.369243
LUL	1	30	30	0.006	3.7273	3.7375	4.6667	4.8833	4.65	-0.25517	1.61413	-0.11806	-1.03386	0.21216	-1.04406	-0.72973	-0.00441	0.39069	1.51469	3.07004	-1.68031	0.8733	0.866	0.0376515	0.0867188	0.127875	0.206879	0.182462	0.152814	0.227832	0.128346	0.12084	0.152428	0.232861	0.227832	0.330544	0.380203	0.196089	0.311938	0.152814	0.182462	0.112543	0.109854	0.352212	0.149814	0.206879	0.104897	0.279181	0.27636
LYL	2	14	14	0.02	3.8967	4.0125	4.9383	4.9983	4.765	1.39877	1.67494	0.67287	-0.72947	0.69214	0.0894	-1.59514	0.0971	0.31222	-0.36506	0.85308	-0.83172	0.8928	0.8758	0.0417408	0.0774235	0.116062	0.221386	0.219241	0.142599	0.142373	0.0656798	0.11126	0.12634	0.198965	0.142373	0.315723	0.353217	0.176558	0.2594	0.142599	0.219241	0.112111	0.0933428	0.270829	0.105808	0.221386	0.111186	0.231113	0.191558
MAN	1	28	28	0.028	3.7193	3.625	4.7733	4.98	4.125	1.57709	-0.52746	-0.9177	-0.79837	0.89911	0.51456	1.45375	0.50331	1.19505	-0.82264	1.20873	-0.62166	0.8768	0.8866	0.0487421	0.0692244	0.107581	0.259591	0.17529	0.152236	0.174119	0.105277	0.167725	0.140414	0.201411	0.174119	0.288007	0.384754	0.261604	0.274769	0.152236	0.17529	0.141008	0.124597	0.296502	0.223174	0.259591	0.126099	0.363806	0.296069
MAR	2	20	20	0.006	4.2107	4.3913	4.6233	4.925	4.3	0.55031	0.1628	0.63158	-0.03089	0.30061	1.97253	-0.25684	0.02975	0.46498	-0.0804	0.37834	0.55687	0.863	0.8986	0.0419441	0.0601808	0.14188	0.19792	0.203386	0.170431	0.147625	0.0960403	0.12677	0.106373	0.167346	0.147625	0.327662	0.349137	0.238094	0.282543	0.170431	0.203386	0.1522	0.120959	0.304011	0.154997	0.19792	0.136681	0.265205	0.22823
MIS	1	20	20	0.021	3.9167	4.4475	4.285	4.385	4.425	-0.2233	-0.98087	0.93737	-0.07685	-1.32932	0.60764	-0.90956	0.04418	-1.08898	-0.03358	-1.24237	-0.80974	0.8438	0.8655	0.0334416	0.0562174	0.12423	0.189733	0.202129	0.158427	0.136828	0.0843659	0.0846364	0.0711537	0.140411	0.136828	0.285574	0.306004	0.184631	0.237177	0.158427	0.202129	0.11714	0.0857291	0.318368	0.139452	0.189733	0.0952138	0.220292	0.190697
MON	1	20	20	0.03	3.9487	3.8	4.55	4.95	4.5	-0.23858	-1.44316	-0.60124	-0.63071	0.78454	0.93013	-0.07406	-0.60843	1.44488	-0.87449	-0.82437	-0.71785	0.8468	0.8933	0.0432738	0.0778258	0.146035	0.16833	0.153845	0.150521	0.139781	0.0927201	0.15263	0.0991232	0.16833	0.139781	0.258788	0.340428	0.181679	0.24909	0.150521	0.153845	0.122387	0.109619	0.240606	0.190719	0.16833	0.120655	0.279814	0.249651
MUF	1	31	31	0.028	3.634	4.0225	4.485	4.7	4.745	-0.04871	-0.60413	-0.59227	0.93697	0.74367	0.46636	2.08393	1.44921	-0.16725	-0.82962	-0.26601	0.42653	0.8567	0.888	0.0441486	0.0743719	0.143291	0.271447	0.239155	0.171316	0.158377	0.0884064	0.135099	0.138296	0.164827	0.158377	0.281761	0.380696	0.196604	0.259365	0.171316	0.239155	0.17769	0.145797	0.27327	0.235307	0.271447	0.104382	0.354993	0.377035
NAH	2	26	26	0.024	3.75	3.7188	3.7917	4.82	4	-1.06478	0.90293	-0.74983	1.12914	-0.34234	0.84988	0.94852	0.34781	-0.76111	-0.87783	-0.89525	0.51366	0.8748	0.8929	0.0470618	0.0580018	0.134909	0.20253	0.229586	0.16054	0.124717	0.0842742	0.135539	0.114405	0.124806	0.124717	0.285538	0.304799	0.263554	0.260646	0.16054	0.229586	0.147478	0.117065	0.284714	0.159537	0.20253	0.094154	0.297259	0.260222
NOW	2	29	29	0.028	3.0307	5.235	5.68	5.1983	4.455	-1.64841	-0.61128	-0.85456	1.52084	-1.50295	0.28768	0.48036	-0.08952	0.0286	-0.52159	-0.80926	0.76803	0.8769	0.8692	0.0358623	0.0548329	0.126959	0.183493	0.17174	0.166612	0.154762	0.0991286	0.140418	0.0795391	0.160138	0.154762	0.293256	0.334155	0.235192	0.255692	0.166612	0.17174	0.133909	0.144704	0.299263	0.187712	0.183493	0.0944533	0.316835	0.232854
ORE	1	24	24	0.018	3.932	3.7163	4.9117	4.6483	5.325	0.3329	0.2302	-2.65041	0.32133	-0.63349	0.4159	-0.69137	-0.15339	0.21931	0.04588	-0.69556	0.11865	0.8667	0.9108	0.0382032	0.0647818	0.127324	0.187677	0.189363	0.114942	0.17686	0.0861098	0.11954	0.0745812	0.145361	0.17686	0.293778	0.330388	0.185331	0.254828	0.114942	0.189363	0.157363	0.116173	0.336557	0.121772	0.187677	0.12364	0.222356	0.271241
OSC	2	23	23	0.008	4.4767	4.8875	5.1067	5.1883	4.065	0.2211	0.31386	1.50827	-1.69952	-0.37687	-0.34582	-0.75389	0.79157	-2.49848	-0.3042	-0.1537	-0.34267	0.8804	0.8936	0.0379866	0.054331	0.135501	0.247163	0.234463	0.14752	0.125698	0.0727152	0.0753776	0.10556	0.139393	0.125698	0.322343	0.328585	0.206595	0.240544	0.14752	0.234463	0.116026	0.092207	0.328125	0.178815	0.247163	0.077276	0.160661	0.194238
PIP	2	18	18	0.024	3.4667	3.25	4.5167	4.8	4.3	0.71543	-1.84316	-0.25367	-1.57145	0.75901	-0.2281	-0.45065	-2.28362	0.51643	-0.21704	-1.53979	1.4304	0.9047	0.869	0.0478423	0.0677283	0.116736	0.143973	0.109041	0.132794	0.138012	0.0799635	0.117579	0.0861419	0.185876	0.138012	0.237113	0.266151	0.175002	0.234651	0.132794	0.109041	0.178305	0.133625	0.313994	0.151329	0.143973	0.113866	0.225548	0.181539
PUN	2	30	30	0.023	3.8613	4.6688	4.6083	4.9483	4.5	-0.40046	0.28598	-1.94798	-1.40133	1.07239	-0.33806	0.26497	-0.7938	0.25989	-0.44287	0.79665	0.22016	0.8632	0.849	0.0446854	0.0777914	0.125216	0.172427	0.143312	0.14256	0.150305	0.092912	0.129852	0.152346	0.183458	0.150305	0.296784	0.360613	0.199636	0.241647	0.14256	0.143312	0.138405	0.130687	0.315401	0.155507	0.172427	0.101901	0.339247	0.247262
REE	2	26	26	0.026	4.7393	4.8813	4.4667	5.0633	4.34	-0.58043	0.76724	-0.08216	1.92655	0.44823	-0.9399	0.10179	-0.33211	-0.64941	4.93459	-1.26214	-0.53368	0.7956	0.8619	0.0395906	0.0681659	0.141227	0.196157	0.260595	0.165176	0.135618	0.31337	0.125823	0.10699	0.137456	0.135618	0.296971	0.288362	0.132416	0.299478	0.165176	0.260595	0.128912	0.115118	0.498364	0.190725	0.196157	0.0953431	0.31902	0.22935
ROS	1	38	38	0.008	3.3513	3.5613	3.8983	3.0433	3.875	-0.29344	1.06534	-0.78901	-0.07145	-0.26436	-0.72595	0.4967	-0.25392	-0.2038	0.51096	1.15852	-0.015	0.8669	0.8561	0.0439265	0.055524	0.121191	0.184019	0.208429	0.160348	0.136497	0.128088	0.140745	0.162658	0.178469	0.136497	0.339787	0.335343	0.204257	0.282228	0.160348	0.208429	0.142905	0.119548	0.283102	0.192374	0.184019	0.0964775	0.28358	0.298365
RUS	2	17	17	0.024	4.2273	4.4463	4.5733	5.0017	4.89	-1.01266	-0.38251	0.05508	-0.14972	-0.68015	0.28791	0.13807	-0.21616	0.06501	0.13094	-0.21825	0.67469	0.8351	0.9045	0.0378202	0.0689238	0.131433	0.153675	0.210092	0.175807	0.173804	0.0887045	0.14261	0.132588	0.17066	0.173804	0.287425	0.322996	0.185572	0.255522	0.175807	0.210092	0.13132	0.131528	0.340068	0.154982	0.153675	0.0870696	0.300007	0.236976
TOH	2	23	23	0.026	3.756	3.6863	4	3.7217	3.835	0.50476	-0.16983	-0.30131	-0.15347	0.84998	0.04687	-0.29693	-0.83703	1.86088	-1.00802	0.30989	-0.45442	0.8657	0.9012	0.0445563	0.0600615	0.138775	0.164279	0.147441	0.156129	0.18468	0.0841021	0.139183	0.129959	0.188179	0.18468	0.281693	0.326703	0.208021	0.249774	0.156129	0.147441	0.132242	0.107689	0.244421	0.165919	0.164279	0.150596	0.277803	0.239791
TOT	2	18	18	0.0219	4.32	4.075	4.0667	4.6333	3.45	-0.71777	0.6703	0.04817	0.1936	0.56364	-0.46498	0.29786	-0.19664	0.38974	-0.01332	1.28999	-1.3457	0.8691	0.8774	0.0477673	0.0686377	0.11582	0.197968	0.174244	0.169365	0.184566	0.0934988	0.137787	0.145636	0.189259	0.184566	0.302275	0.32778	0.24296	0.27742	0.169365	0.174244	0.132848	0.0967494	0.308984	0.186995	0.197968	0.121765	0.287807	0.2637
[truncated: 29 more columns]

## Sheet: Table S11
Table S11: Dataset with individual name, sex, age at personality rating, age at blood sampling, relatedness coefficient,early social rearing conditions, personality dimension scores (reac=Reactivity, dom=Dominance, ope=Openess,ext=Extraversion, agr=Agreeableness), Principal Compont scores for each component for HTT (=serotonin transporter) or HTR (=serotonin receptor) and individual CpG site scor…
Name	relatedness	agepersonality	sex	ageblood	rearing	reac	dom	ope	ext	agr	HTT_PC1	HTT_PC2	HTT_PC3	HTT_PC4	HTT_PC5	HTT_PC6	HTR_PC1	HTR_PC2	HTR_PC3	HTR_PC4	HTR_PC5	HTR_PC6	HTT_cg10	HTT_cg22	cg10901968	cg26741280	cg12074493	cg20598238	cg08764163	cg11615755	cg16807523	cg13666507	cg08259925	cg16280141	cg07839533	cg16807523	cg11432303	cg17386123	cg04694812	cg10198270	cg11615755	cg08764163	cg04427003	cg02266732	cg27420687	cg04799838	cg20598238	cg15092168	cg10588470
ADO	0.0056	38	Male	37	nursery	4.265	3.70375	3.77833	3.65833	3.375	0.65361	0.24379	-2.5568	-0.08492	0.19783	0.49209	0.17586	-0.00108	1.5142	-0.49379	0.62718	1.75169	0.8971	0.8955	0.0482654	0.0598063	0.12404	0.175272	0.213518	0.189926	0.206768	0.0813441	0.148974	0.151913	0.174565	0.206768	0.286843	0.35567	0.22733	0.270396	0.189926	0.213518	0.130629	0.155072	0.344066	0.193124	0.175272	0.160608	0.268487
AHN	0.0139	17	female	17	mother	4.615	3.145	4.49	4.0767	3.895	0.18673	-0.44743	0.94489	0.42746	0.10284	-0.95469	2.20816	0.7197	0.35632	0.55868	0.62333	2.52354	0.8861	0.9023	0.0436558	0.0566698	0.125569	0.187559	0.278189	0.212862	0.210088	0.0873364	0.126912	0.129	0.206295	0.210088	0.309295	0.351793	0.24301	0.306782	0.212862	0.278189	0.190243	0.181297	0.354337	0.236874	0.187559	0.127821	0.368394
AKI	0.0208	32	Male	32	nursery	4.5	4.6888	5.0917	4.85	3.695	-1.45895	1.25047	-0.86961	-0.76583	-1.28739	-0.62708	0.27347	-0.47318	0.87944	-0.67123	0.16789	-1.33866	0.8958	0.9131	0.0375637	0.0547833	0.137028	0.177619	0.193995	0.165933	0.141262	0.0893864	0.134783	0.134163	0.187077	0.141262	0.276218	0.317835	0.218294	0.256649	0.165933	0.193995	0.127384	0.0934046	0.233059	0.175135	0.177619	0.122865	0.30803
ALE	0.0153	25	Male	27	mother	4.785	4.93	4.7383	5.0883	4.765	-1.03515	1.25241	-0.31134	0.00763	-0.71694	0.42824	0.66358	3.69224	-0.2314	-1.02187	-1.04477	-1.29783	0.872	0.8693	0.0411128	0.0692371	0.110878	0.343064	0.297094	0.197811	0.25546	0.100019	0.154989	0.139979	0.119206	0.25546	0.313503	0.346634	0.19826	0.237643	0.197811	0.297094	0.154663	0.0901325	0.313505	0.169953	0.343064	0.100284	0.275341
ALP	0.0083	28	female	27	mother	4.995	4.3713	5.4883	4.4617	4.625	-0.49297	0.91839	1.33235	-0.15871	-2.28911	0.14952	-1.18743	1.07042	1.42485	0.97157	-0.72322	0.74401	0.8787	0.8786	0.0289319	0.0539248	0.0998706	0.242103	0.307142	0.118441	0.170058	0.0811999	0.155019	0.0709144	0.170623	0.170058	0.315387	0.346141	0.170629	0.305718	0.118441	0.307142	0.113983	0.161169	0.344069	0.130351	0.242103	0.130006	0.308338
AUS	0.0181	20	Male	20	mother	4.57	4.1913	4.525	4.59	4.5	0.85348	-0.71582	0.16067	-0.59139	-0.95099	-0.57274	-1.57915	0.04988	-1.20383	0.05432	0.27982	-0.87771	0.89	0.8774	0.0354062	0.0569121	0.0979155	0.194092	0.181577	0.129553	0.144013	0.0588948	0.0837357	0.110497	0.127848	0.144013	0.325829	0.341383	0.157953	0.259244	0.129553	0.181577	0.106226	0.0811028	0.325464	0.139023	0.194092	0.0982274	0.197366
BAR	0.0255	22	Male	22	nursery	4.455	4.285	4.4383	4.9233	5.135	1.73338	0.39769	-0.04628	0.72837	1.1708	0.51645	0.56524	0.90519	-0.52984	-0.46624	1.72262	-0.25816	0.8799	0.9109	0.046414	0.070294	0.144661	0.234625	0.202656	0.157115	0.20404	0.0705592	0.113774	0.147247	0.181289	0.20404	0.333986	0.387491	0.220816	0.268795	0.157115	0.202656	0.133777	0.120205	0.323529	0.220827	0.234625	0.107711	0.290805
BEC	0.0056	21	female	20	nursery	4.395	3.5363	4.955	4.7017	4.46	-0.39907	0.46219	2.1701	1.31621	0.68489	0.72849	-0.44872	0.50248	-0.51202	0.4764	-0.69973	-0.90749	0.8938	0.8974	0.0448668	0.0601127	0.134643	0.238635	0.211077	0.152669	0.170632	0.100161	0.124221	0.0966343	0.161689	0.170632	0.270984	0.326593	0.182125	0.259372	0.152669	0.211077	0.117324	0.111757	0.35704	0.15964	0.238635	0.083571	0.293662
BER	0.0153	34	female	34	nursery	4.415	3.4175	4.6317	3.72	4.225	0.50381	-1.26282	-0.09635	2.51311	-0.86013	-1.23926	1.29967	-0.34385	0.04899	0.66007	0.24659	0.64984	0.8736	0.8928	0.038855	0.0593155	0.127623	0.175349	0.232306	0.162762	0.17334	0.105617	0.137412	0.126451	0.192322	0.17334	0.304291	0.326633	0.205385	0.268499	0.162762	0.232306	0.180863	0.133307	0.345548	0.234322	0.175349	0.11721	0.316988
BIL	0.02	19	Male	19	mother	4.47	4.2438	4.41	4.905	4.45	-0.86459	-0.93803	0.31557	-1.84761	0.24424	-0.86217	0.49874	-0.82105	-0.93705	-0.58416	-1.55917	-0.30549	0.8588	0.8963	0.0400696	0.0675871	0.136602	0.161289	0.163302	0.174378	0.11124	0.0940612	0.11362	0.0935854	0.143568	0.11124	0.233498	0.272903	0.227085	0.24394	0.174378	0.163302	0.125225	0.0882438	0.292084	0.178418	0.161289	0.0761004	0.243634
BO	0.0273	19	Male	19	mother	4.38	4.7425	4.8533	5.1217	4.25	-1.302	0.54207	1.53244	-0.6257	1.12211	-0.56155	-0.7071	0.07409	-0.91591	0.07341	0.19522	-0.31974	0.8846	0.8789	0.0443217	0.0815158	0.142414	0.22808	0.14986	0.152922	0.168898	0.125687	0.111657	0.103777	0.166064	0.168898	0.303853	0.326816	0.195168	0.26504	0.152922	0.14986	0.102662	0.1323	0.273647	0.133674	0.22808	0.0661217	0.263225
CAS	0.0139	22	female	23	mother	4.67	3.35	4.3217	4.5117	4.5	-1.39223	0.48936	0.20313	0.04622	0.30491	0.08817	0.6281	0.35191	0.50805	1.06127	-0.35639	1.2434	0.8634	0.8685	0.0411695	0.0725941	0.164088	0.220396	0.277341	0.195219	0.128985	0.117419	0.140001	0.123295	0.221341	0.128985	0.332182	0.300119	0.208611	0.255842	0.195219	0.277341	0.121288	0.151871	0.381971	0.215049	0.220396	0.121878	0.317782
CHE	0.0181	15	Male	16	mother	5.08	4.8025	5.0283	5.4733	4.665	0.8298	-0.9783	1.51814	-1.00789	-0.76732	3.94867	-1.714	1.1149	-0.44495	-1.88034	-0.89897	0.54735	0.8876	0.8547	0.0364027	0.0479813	0.122591	0.262809	0.168993	0.180579	0.146654	0.0781135	0.0972883	0.085729	0.131283	0.146654	0.283251	0.379088	0.206788	0.24205	0.180579	0.168993	0.0903903	0.131692	0.22946	0.112535	0.262809	0.0946916	0.203619
CHI	0.0278	22	Male	24	mother	5.09	3.9775	4.7433	5.1817	4.255	-2.03411	-0.31388	-0.81136	-0.81554	-0.02867	0.04143	0.52469	-1.52657	1.26447	-0.32861	0.21803	-0.12057	0.8835	0.8766	0.0414368	0.0700929	0.1582	0.166618	0.119155	0.166038	0.128204	0.128155	0.148559	0.143925	0.212486	0.128204	0.249258	0.333126	0.212247	0.249652	0.166038	0.119155	0.147767	0.126774	0.280087	0.195179	0.166618	0.119244	0.278964
CHR	0.0139	41	female	42	mother	3.555	4.1338	3.98	3.9617	4	-0.95142	-0.76168	-1.28712	1.05745	1.63043	-0.6455	1.70927	-0.59346	-1.19595	-0.04787	0.27119	-0.42187	0.8646	0.8767	0.0477611	0.0859127	0.143621	0.157144	0.164284	0.161931	0.141839	0.111637	0.124425	0.138676	0.14848	0.141839	0.279001	0.322724	0.250843	0.248591	0.161931	0.164284	0.146474	0.112446	0.343226	0.207764	0.157144	0.0856621	0.330526
CYB	0.0083	17	female	17	mother	4.08	2.7675	3.99	4.5117	3.695	-0.9797	0.36414	0.72472	0.66758	1.06123	1.69826	1.1873	-0.71291	-0.20698	-0.08124	0.19797	-1.26261	0.8773	0.8901	0.0435227	0.069621	0.164382	0.181353	0.155936	0.137778	0.179546	0.106987	0.12379	0.126053	0.159715	0.179546	0.278577	0.307836	0.229772	0.261869	0.137778	0.155936	0.157052	0.11004	0.277177	0.195378	0.181353	0.103606	0.404313
COY	0.0194	29	Male	29	mother	4.8	4.625	4.7117	4.845	4.67	0.99127	1.37139	-0.57026	-0.67146	-0.14626	0.96428	-1.17781	-0.45475	0.87527	-0.33254	1.21783	1.51347	0.8767	0.8639	0.0400719	0.0695442	0.111929	0.205747	0.17623	0.126869	0.184534	0.0781898	0.144805	0.159325	0.179911	0.184534	0.325774	0.344283	0.204173	0.277245	0.126869	0.17623	0.141426	0.144632	0.321278	0.131975	0.205747	0.127196	0.20273
EHS	0.0184	15	Male	17	mother	4.635	4.7963	4.9567	5.0117	4.165	-0.50253	-1.86799	0.66018	-0.95512	-1.1657	-1.07408	-0.23062	-1.23264	-1.07227	-0.54165	-0.75886	0.21141	0.87	0.9005	0.0313337	0.0654504	0.10185	0.137972	0.137715	0.122413	0.126221	0.0765233	0.107543	0.118159	0.10596	0.126221	0.259714	0.299673	0.175227	0.246036	0.122413	0.137715	0.102561	0.127091	0.270024	0.165035	0.137972	0.0835	0.272393
EMI	0.0111	27	female	28	mother	4.535	4.5338	4.455	4.2217	4.22	-0.25164	-1.11204	-0.23445	2.16364	-0.40741	1.39318	0.90566	0.0801	-0.64002	-0.65365	0.50893	0.13392	0.8668	0.8709	0.0370731	0.069061	0.133141	0.173622	0.191976	0.149672	0.158774	0.0857938	0.144725	0.131722	0.147214	0.158774	0.30836	0.374557	0.228379	0.250234	0.149672	0.191976	0.141209	0.125939	0.317416	0.203675	0.173622	0.0874149	0.323339
GIS	0.0153	27	Male	20	nursery	4.36	4.4838	5.2883	5.1333	4.485	2.33387	0.50921	0.25671	0.47442	-1.21526	-0.5293	-1.34801	0.28974	-2.61249	0.16405	1.84942	3.06431	0.8579	0.9114	0.0343896	0.0578816	0.117801	0.247364	0.183104	0.152061	0.152152	0.0571713	0.091348	0.166465	0.128782	0.152152	0.38958	0.349407	0.207598	0.300398	0.152061	0.183104	0.12875	0.188318	0.332336	0.146508	0.247364	0.0769463	0.192122
GRA	0.0167	18	female	20	nursery	4.89	4.1463	4.835	4.895	4.305	0.26282	-2.23628	-0.29779	-0.25655	0.00594	-0.56221	0.52168	-1.47029	-0.16551	-0.61359	-1.52329	-0.8476	0.849	0.8999	0.0441976	0.0567667	0.103578	0.126647	0.145012	0.12391	0.110266	0.0827778	0.126098	0.0945824	0.121577	0.110266	0.244354	0.298164	0.160867	0.241109	0.12391	0.145012	0.12588	0.106003	0.226086	0.24661	0.126647	0.101816	0.298592
HOB	0.0198	20	Male	22	nursery	5.1	4.8875	4.8	5	4.75	0.6049	-0.68218	-0.45846	0.15902	-1.70351	0.02248	1.13054	-0.64071	-0.11767	0.8144	-0.06613	1.17522	0.8826	0.9016	0.0348331	0.0550176	0.11255	0.208988	0.197468	0.15418	0.1682	0.100952	0.123996	0.114706	0.195309	0.1682	0.30652	0.310918	0.203569	0.253796	0.15418	0.197468	0.192656	0.132395	0.401546	0.234522	0.208988	0.13021	0.326087
HUE	0.0056	20	Male	22	mother	4.5	4.4113	4.355	4.6333	4	-0.3251	-0.43497	0.04948	-0.12522	-0.68568	0.72151	-0.11421	-1.02606	-0.02612	-0.22631	0.42525	-0.62558	0.8832	0.8736	0.0420363	0.0566089	0.110171	0.149129	0.184721	0.142268	0.100258	0.0772195	0.108595	0.12297	0.163861	0.100258	0.292654	0.340891	0.22888	0.258488	0.142268	0.184721	0.120769	0.104541	0.297313	0.156413	0.149129	0.122634	0.32851
HUH	0.0219	18	Male	18	mother	4.225	3.9938	4.6483	4.575	4.12	1.30804	-0.78909	0.19007	0.68627	-0.04589	-1.24367	0.68999	0.54932	-0.90665	0.13075	0.98654	-1.06391	0.8923	0.8749	0.041315	0.066038	0.0938674	0.216967	0.211801	0.144829	0.196578	0.0751367	0.113539	0.109006	0.173488	0.196578	0.289644	0.364874	0.212139	0.272954	0.144829	0.211801	0.11871	0.119973	0.335528	0.226037	0.216967	0.0969108	0.299699
JAK	0.0273	22	Male	22	mother	4.59	3.8913	4.575	4.5767	4.2	-0.45647	-0.96608	0.33397	-0.92921	-1.07431	-1.11317	-0.7502	-0.74942	-0.81998	-0.50598	-1.65621	0.52577	0.8724	0.8756	0.0360106	0.0582656	0.103707	0.181306	0.153491	0.132499	0.123908	0.0608412	0.119162	0.108779	0.109922	0.123908	0.280945	0.275729	0.157639	0.235961	0.132499	0.153491	0.130556	0.125574	0.285191	0.13669	0.181306	0.0853325	0.273297
JUD	0.0201	20	Male	22	mother	5.42	4.86	5.6267	4.585	3.67	0.52558	-0.43734	1.85786	1.11538	0.94824	-2.33727	-0.5658	-0.67583	-0.74649	0.65715	0.42418	-0.52174	0.8832	0.8896	0.0398017	0.0749268	0.125215	0.190741	0.206046	0.126801	0.140357	0.0912576	0.127028	0.148007	0.161824	0.140357	0.297301	0.303792	0.183765	0.267404	0.126801	0.206046	0.115053	0.124254	0.325018	0.16439	0.190741	0.0877065	0.285665
KAK	0.0069	31	female	32	mother	4.75	3.4788	3.7083	4.0417	3.96	0.57432	1.88117	0.5403	-0.89337	-1.00403	-0.45925	-1.38714	-0.39812	1.59803	1.02107	-0.37347	-0.50773	0.8793	0.8988	0.0352985	0.0521428	0.0912508	0.186574	0.188332	0.181345	0.11899	0.0902805	0.133754	0.0879614	0.186978	0.11899	0.30811	0.334886	0.153161	0.282085	0.181345	0.188332	0.112375	0.114756	0.332394	0.135316	0.186574	0.148386	0.2877
KAY	0.0056	21	female	22	nursery	5.3	3.8	4.9333	5.3667	4.6	0.17221	1.15538	1.32856	1.50403	0.47511	-0.21503	-1.59037	0.77786	1.82577	-0.58062	-0.12312	0.24825	0.8824	0.9023	0.0447377	0.0625774	0.131033	0.243001	0.191759	0.14337	0.173613	0.0785957	0.19627	0.107923	0.156947	0.173613	0.364896	0.336385	0.182922	0.270858	0.14337	0.191759	0.100517	0.126542	0.274966	0.127701	0.243001	0.12212	0.264522
KEN	0.0056	21	Male	21	nursery	4.91	5.215	5.4067	5.165	3.74	1.44292	0.724	-0.47792	-0.81707	-0.31196	-1.08497	-1.26604	-0.16543	-0.47206	0.04993	0.9698	0.12066	0.8709	0.8715	0.0420544	0.0535647	0.108111	0.197099	0.265223	0.151043	0.194827	0.0694747	0.0934295	0.134437	0.222533	0.194827	0.296605	0.328815	0.205174	0.23873	0.151043	0.265223	0.118585	0.127203	0.340369	0.143531	0.197099	0.111161	0.202719
LEX	0.0056	14	female	13	mother	4.505	3.365	4.56	5.2967	4.055	-1.46863	1.03116	0.20884	-0.51032	1.45138	0.31798	1.16494	0.88187	0.83386	1.61994	-1.27319	-0.65799	0.8677	0.8651	0.0495721	0.0802294	0.156074	0.223823	0.23589	0.177763	0.158196	0.144701	0.140434	0.0785725	0.159442	0.158196	0.274335	0.327902	0.180961	0.289752	0.177763	0.23589	0.14411	0.10958	0.402253	0.177516	0.223823	0.121479	0.372676
LUL	0.0153	51	female	30	mother	4.85	3.7375	4.6667	4.8833	4.65	-0.25517	1.61413	-0.11806	-1.03386	0.21216	-1.04406	-0.72973	-0.00441	0.39069	1.51469	3.07004	-1.68031	0.8733	0.866	0.0376515	0.0867188	0.127875	0.206879	0.182462	0.152814	0.227832	0.128346	0.12084	0.152428	0.232861	0.227832	0.330544	0.380203	0.196089	0.311938	0.152814	0.182462	0.112543	0.109854	0.352212	0.149814	0.206879	0.104897	0.279181
LYL	0.0201	12	Male	14	mother	4.835	4.0125	4.9383	4.9983	4.765	1.39877	1.67494	0.67287	-0.72947	0.69214	0.0894	-1.59514	0.0971	0.31222	-0.36506	0.85308	-0.83172	0.8928	0.8758	0.0417408	0.0774235	0.116062	0.221386	0.219241	0.142599	0.142373	0.0656798	0.11126	0.12634	0.198965	0.142373	0.315723	0.353217	0.176558	0.2594	0.142599	0.219241	0.112111	0.0933428	0.270829	0.105808	0.221386	0.111186	0.231113
MAN	0.0278	29	female	28	mother	4.94	3.625	4.7733	4.98	4.125	1.57709	-0.52746	-0.9177	-0.79837	0.89911	0.51456	1.45375	0.50331	1.19505	-0.82264	1.20873	-0.62166	0.8768	0.8866	0.0487421	0.0692244	0.107581	0.259591	0.17529	0.152236	0.174119	0.105277	0.167725	0.140414	0.201411	0.174119	0.288007	0.384754	0.261604	0.274769	0.152236	0.17529	0.141008	0.124597	0.296502	0.223174	0.259591	0.126099	0.363806
MAR	0.0056	18	Male	20	mother	4.55	4.3913	4.6233	4.925	4.3	0.55031	0.1628	0.63158	-0.03089	0.30061	1.97253	-0.25684	0.02975	0.46498	-0.0804	0.37834	0.55687	0.863	0.8986	0.0419441	0.0601808	0.14188	0.19792	0.203386	0.170431	0.147625	0.0960403	0.12677	0.106373	0.167346	0.147625	0.327662	0.349137	0.238094	0.282543	0.170431	0.203386	0.1522	0.120959	0.304011	0.154997	0.19792	0.136681	0.265205
MIS	0.0208	29	female	20	mother	4.63	4.4475	4.285	4.385	4.425	-0.2233	-0.98087	0.93737	-0.07685	-1.32932	0.60764	-0.90956	0.04418	-1.08898	-0.03358	-1.24237	-0.80974	0.8438	0.8655	0.0334416	0.0562174	0.12423	0.189733	0.202129	0.158427	0.136828	0.0843659	0.0846364	0.0711537	0.140411	0.136828	0.285574	0.306004	0.184631	0.237177	0.158427	0.202129	0.11714	0.0857291	0.318368	0.139452	0.189733	0.0952138	0.220292
MON	0.03	21	female	20	mother	4.45	3.8	4.55	4.95	4.5	-0.23858	-1.44316	-0.60124	-0.63071	0.78454	0.93013	-0.07406	-0.60843	1.44488	-0.87449	-0.82437	-0.71785	0.8468	0.8933	0.0432738	0.0778258	0.146035	0.16833	0.153845	0.150521	0.139781	0.0927201	0.15263	0.0991232	0.16833	0.139781	0.258788	0.340428	0.181679	0.24909	0.150521	0.153845	0.122387	0.109619	0.240606	0.190719	0.16833	0.120655	0.279814
MUF	0.0278	30	female	31	mother	4.68	4.0225	4.485	4.7	4.745	-0.04871	-0.60413	-0.59227	0.93697	0.74367	0.46636	2.08393	1.44921	-0.16725	-0.82962	-0.26601	0.42653	0.8567	0.888	0.0441486	0.0743719	0.143291	0.271447	0.239155	0.171316	0.158377	0.0884064	0.135099	0.138296	0.164827	0.158377	0.281761	0.380696	0.196604	0.259365	0.171316	0.239155	0.17769	0.145797	0.27327	0.235307	0.271447	0.104382	0.354993
NAH	0.0243	24	Male	26	mother	4.25	3.7188	3.7917	4.82	4	-1.06478	0.90293	-0.74983	1.12914	-0.34234	0.84988	0.94852	0.34781	-0.76111	-0.87783	-0.89525	0.51366	0.8748	0.8929	0.0470618	0.0580018	0.134909	0.20253	0.229586	0.16054	0.124717	0.0842742	0.135539	0.114405	0.124806	0.124717	0.285538	0.304799	0.263554	0.260646	0.16054	0.229586	0.147478	0.117065	0.284714	0.159537	0.20253	0.094154	0.297259
NOW	0.0278	29	Male	29	nursery	5.275	5.235	5.68	5.1983	4.455	-1.64841	-0.61128	-0.85456	1.52084	-1.50295	0.28768	0.48036	-0.08952	0.0286	-0.52159	-0.80926	0.76803	0.8769	0.8692	0.0358623	0.0548329	0.126959	0.183493	0.17174	0.166612	0.154762	0.0991286	0.140418	0.0795391	0.160138	0.154762	0.293256	0.334155	0.235192	0.255692	0.166612	0.17174	0.133909	0.144704	0.299263	0.187712	0.183493	0.0944533	0.316835
ORE	0.0184	26	female	24	nursery	4.5	3.7163	4.9117	4.6483	5.325	0.3329	0.2302	-2.65041	0.32133	-0.63349	0.4159	-0.69137	-0.15339	0.21931	0.04588	-0.69556	0.11865	0.8667	0.9108	0.0382032	0.0647818	0.127324	0.187677	0.189363	0.114942	0.17686	0.0861098	0.11954	0.0745812	0.145361	0.17686	0.293778	0.330388	0.185331	0.254828	0.114942	0.189363	0.157363	0.116173	0.336557	0.121772	0.187677	0.12364	0.222356
OSC	0.0083	22	Male	23	nursery	4.565	4.8875	5.1067	5.1883	4.065	0.2211	0.31386	1.50827	-1.69952	-0.37687	-0.34582	-0.75389	0.79157	-2.49848	-0.3042	-0.1537	-0.34267	0.8804	0.8936	0.0379866	0.054331	0.135501	0.247163	0.234463	0.14752	0.125698	0.0727152	0.0753776	0.10556	0.139393	0.125698	0.322343	0.328585	0.206595	0.240544	0.14752	0.234463	0.116026	0.092207	0.328125	0.178815	0.247163	0.077276	0.160661
PIP	0.0243	16	Male	18	mother	4.7	3.25	4.5167	4.8	4.3	0.71543	-1.84316	-0.25367	-1.57145	0.75901	-0.2281	-0.45065	-2.28362	0.51643	-0.21704	-1.53979	1.4304	0.9047	0.869	0.0478423	0.0677283	0.116736	0.143973	0.109041	0.132794	0.138012	0.0799635	0.117579	0.0861419	0.185876	0.138012	0.237113	0.266151	0.175002	0.234651	0.132794	0.109041	0.178305	0.133625	0.313994	0.151329	0.143973	0.113866	0.225548
PUN	0.0229	28	Male	30	mother	4.645	4.6688	4.6083	4.9483	4.5	-0.40046	0.28598	-1.94798	-1.40133	1.07239	-0.33806	0.26497	-0.7938	0.25989	-0.44287	0.79665	0.22016	0.8632	0.849	0.0446854	0.0777914	0.125216	0.172427	0.143312	0.14256	0.150305	0.092912	0.129852	0.152346	0.183458	0.150305	0.296784	0.360613	0.199636	0.241647	0.14256	0.143312	0.138405	0.130687	0.315401	0.155507	0.172427	0.101901	0.339247
REE	0.0257	24	Male	26	mother	5.07	4.8813	4.4667	5.0633	4.34	-0.58043	0.76724	-0.08216	1.92655	0.44823	-0.9399	0.10179	-0.33211	-0.64941	4.93459	-1.26214	-0.53368	0.7956	0.8619	0.0395906	0.0681659	0.141227	0.196157	0.260595	0.165176	0.135618	0.31337	0.125823	0.10699	0.137456	0.135618	0.296971	0.288362	0.132416	0.299478	0.165176	0.260595	0.128912	0.115118	0.498364	0.190725	0.196157	0.0953431	0.31902
RUS	0.0241	17	Male	17	mother	5.225	4.4463	4.5733	5.0017	4.89	-1.01266	-0.38251	0.05508	-0.14972	-0.68015	0.28791	0.13807	-0.21616	0.06501	0.13094	-0.21825	0.67469	0.8351	0.9045	0.0378202	0.0689238	0.131433	0.153675	0.210092	0.175807	0.173804	0.0887045	0.14261	0.132588	0.17066	0.173804	0.287425	0.322996	0.185572	0.255522	0.175807	0.210092	0.13132	0.131528	0.340068	0.154982	0.153675	0.0870696	0.300007
TOH	0.0257	23	Male	23	mother	4.33	3.6863	4	3.7217	3.835	0.50476	-0.16983	-0.30131	-0.15347	0.84998	0.04687	-0.29693	-0.83703	1.86088	-1.00802	0.30989	-0.45442	0.8657	0.9012	0.0445563	0.0600615	0.138775	0.164279	0.147441	0.156129	0.18468	0.0841021	0.139183	0.129959	0.188179	0.18468	0.281693	0.326703	0.208021	0.249774	0.156129	0.147441	0.132242	0.107689	0.244421	0.165919	0.164279	0.150596	0.277803
TOT	0.0219	17	Male	18	mother	3.9	4.075	4.0667	4.6333	3.45	-0.71777	0.6703	0.04817	0.1936	0.56364	-0.46498	0.29786	-0.19664	0.38974	-0.01332	1.28999	-1.3457	0.8691	0.8774	0.0477673	0.0686377	0.11582	0.197968	0.174244	0.169365	0.184566	0.0934988	0.137787	0.145636	0.189259	0.184566	0.302275	0.32778	0.24296	0.27742	0.169365	0.174244	0.132848	0.0967494	0.308984	0.186995	0.197968	0.121765	0.287807
[truncated: 30 more columns]
